# Supplementary material for: Synthesis and antibacterial evaluation of quinoline–sulfonamide hybrid compounds: a promising strategy against bacterial resistance
Source: Royal Society of Chemistry journal article supplement (doi:10.1039/d4ra05069j), 2025-01-01
Supplement: d4ra05069j1.pdf [file d4ra05069j1.pdf]

# **Synthesis and Antibacterial Evaluation of Quinoline-Sulfonamide Hybrid Compounds: A Promising Strategy Against Bacterial Resistance**

**Zohaib Saifi<sup>a</sup>, Asghar Ali<sup>b,c</sup>, Afreen Inam<sup>a</sup>, Amir Azam<sup>a</sup>, Mohan Kamthan<sup>c</sup>, Mohammad Abid<sup>b\*</sup>,  
Imran Ali<sup>a\*\*</sup>**

<sup>a</sup>Department of Chemistry, Jamia Millia Islamia, Jamia Nagar, New Delhi-110025, INDIA

<sup>b</sup>Department of Biosciences, Jamia Millia Islamia, New Delhi-110025, INDIA

<sup>c</sup>Department of Biochemistry, School of Chemical and Life Sciences, Jamia Hamdard, New Delhi-110062, INDIA

**Table S1: Minimum inhibitory concentration (MIC) of compound QS-3 and standard drug CIP in µg/mL.**

| Compound | <i>E. coli</i> | <i>E. faecalis</i> | <i>P. aeruginosa</i> | <i>K. pneumoniae</i> | <i>Salmonella typhi</i> |
|----------|----------------|--------------------|----------------------|----------------------|-------------------------|
| QS-3     | 128            | 128                | 64                   | 256                  | 512                     |
| CIP      | 0.5            | 0.5                | 0.5                  | 0.5                  | 0.5                     |

**Table S2: Zone of inhibition (mm) against environmental Multidrug-resistant bacterial isolates.**

| S. No. | Isolate Name | QS-3 | AMP | CIP |
|--------|--------------|------|-----|-----|
| 1.     | EJH01        | -    | -   | 15  |
| 2.     | EJH02        | -    | 30  | 26  |
| 3.     | EJH04        | -    | -   | -   |
| 4.     | EJH05        | -    | 20  | 25  |
| 5.     | EJH07        | -    | 25  | 22  |
| 6.     | EJH11        | -    | 21  | 26  |
| 7.     | EJH12        | -    | -   | 25  |
| 8.     | EJH13        | -    | -   | 20  |
| 9.     | EJH14        | -    | -   | 22  |
| 10.    | EJH15        | -    | 20  | 17  |
| 11.    | EJH18        | -    | 17  | 25  |
| 12.    | EJH19        | -    | 17  | 21  |
| 13.    | EJH20        | -    | 20  | 19  |
| 14.    | EJH21        | -    | 18  | 26  |
| 15.    | EJH22        | -    | 32  | 14  |
| 16.    | EJH23        | -    | 20  | 24  |
| 17.    | EJH24        | -    | 23  | 28  |
| 18.    | EJH25        | --   | 22  | 21  |
| 19.    | A200         | -    | -   | 18  |
| 20.    | AA 201       | -    | -   | 16  |

|     |        |   |    |    |
|-----|--------|---|----|----|
| 21. | AA 202 | 8 | -  | -  |
| 22. | AA 209 | - | 30 | 21 |
| 23. | AA 216 | - | -  | 24 |
| 24. | AA 221 | - | -  | 21 |
| 25. | AA 224 | - | -  | 11 |
| 26. | AA 237 | - | 26 | 25 |
| 27. | AA 240 | - | 23 | 25 |
| 28. | AA 243 | - | 20 | 19 |
| 29. | AA 245 | - | 18 | 22 |
| 30. | AA 248 | - | 25 | 27 |
| 31. | AA 261 | - | 25 | 29 |
| 32. | AA 269 | - | -  | -  |
| 33. | AA 273 | - | 15 | 14 |
| 34. | AA 276 | - | 22 | 23 |
| 35. | AA 290 | 8 | -  | -  |

**Table S3. Drug ability or Lipinski's 'rule-of-five' data of compounds QS1-QS12.**

| Compounds | Molecular Wt. | No. of HBA | No. of HBD | Mol log P | Molar Refractivity (MR) | Lipinski violation |
|-----------|---------------|------------|------------|-----------|-------------------------|--------------------|
| QS-1      | 460.94        | 4          | 2          | 3.13      | 128.71                  | 0                  |
| QS-2      | 427.88        | 4          | 2          | 3.59      | 113.37                  | 0                  |
| QS-3      | 439.91        | 4          | 2          | 2.88      | 119.9                   | 0                  |
| QS-4      | 459.95        | 3          | 2          | 3.88      | 130.92                  | 0                  |
| QS-5      | 451.97        | 3          | 2          | 3.85      | 127.99                  | 0                  |

|       |        |   |   |      |        |   |
|-------|--------|---|---|------|--------|---|
| QS-6  | 485.98 | 3 | 2 | 4.25 | 138.85 | 1 |
| QS-7  | 460.94 | 4 | 2 | 3.13 | 128.71 | 0 |
| QS-8  | 427.88 | 4 | 2 | 3.59 | 113.37 | 0 |
| QS-9  | 439.91 | 4 | 2 | 2.88 | 119.9  | 0 |
| QS-10 | 459.95 | 3 | 2 | 3.88 | 130.92 | 0 |
| QS-11 | 451.97 | 3 | 2 | 3.85 | 127.99 | 0 |
| QS-12 | 485.98 | 3 | 2 | 4.25 | 138.85 | 1 |

### NMR spectrum of compound QS1-QS12

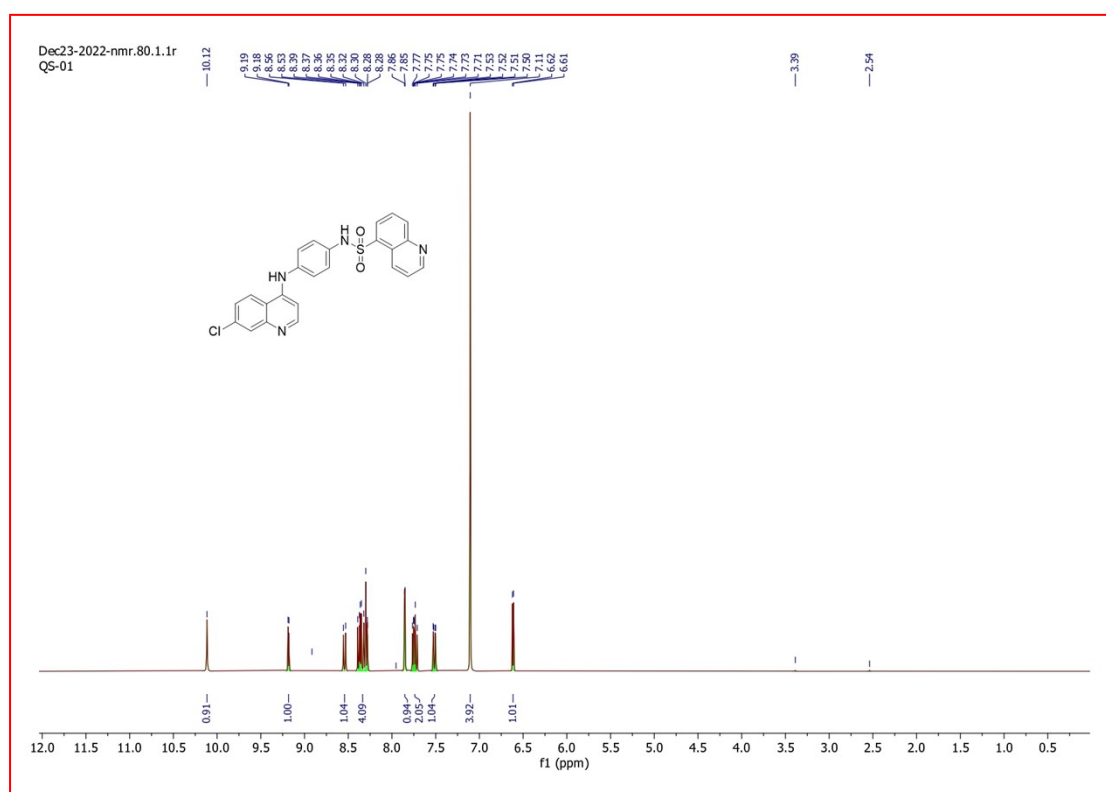

Figure.- S1. <sup>1</sup>H NMR Spectrum of compound (QS-1)

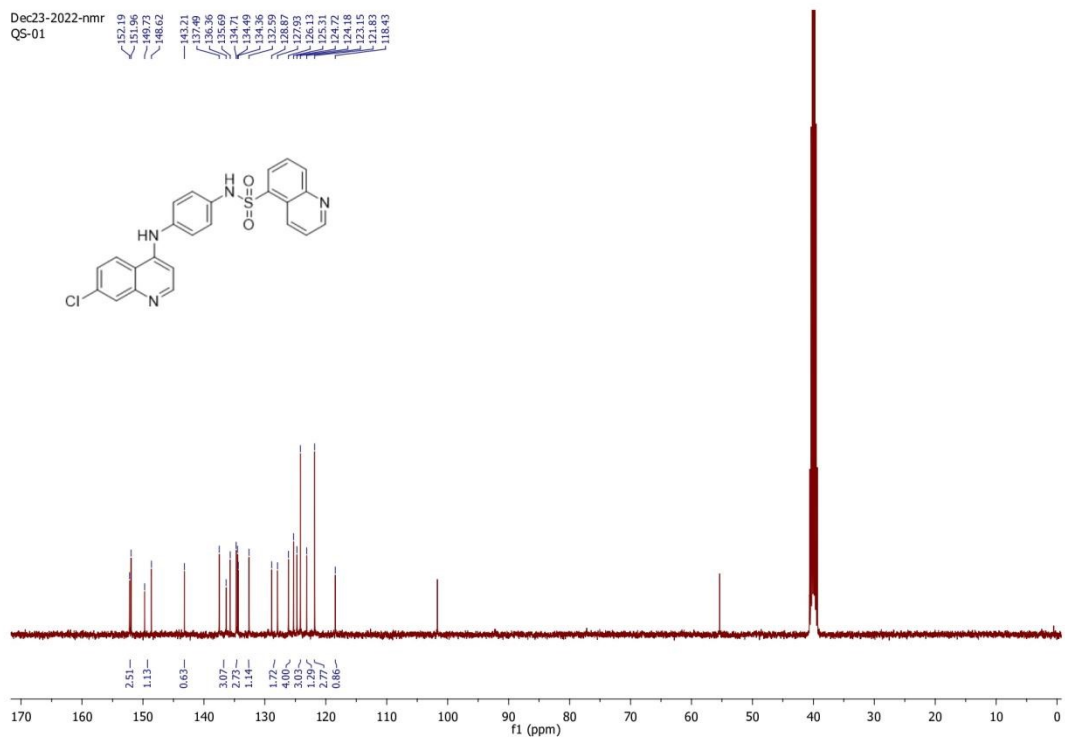

Figure.- S2. <sup>13</sup>C NMR Spectrum of compound (QS-1)

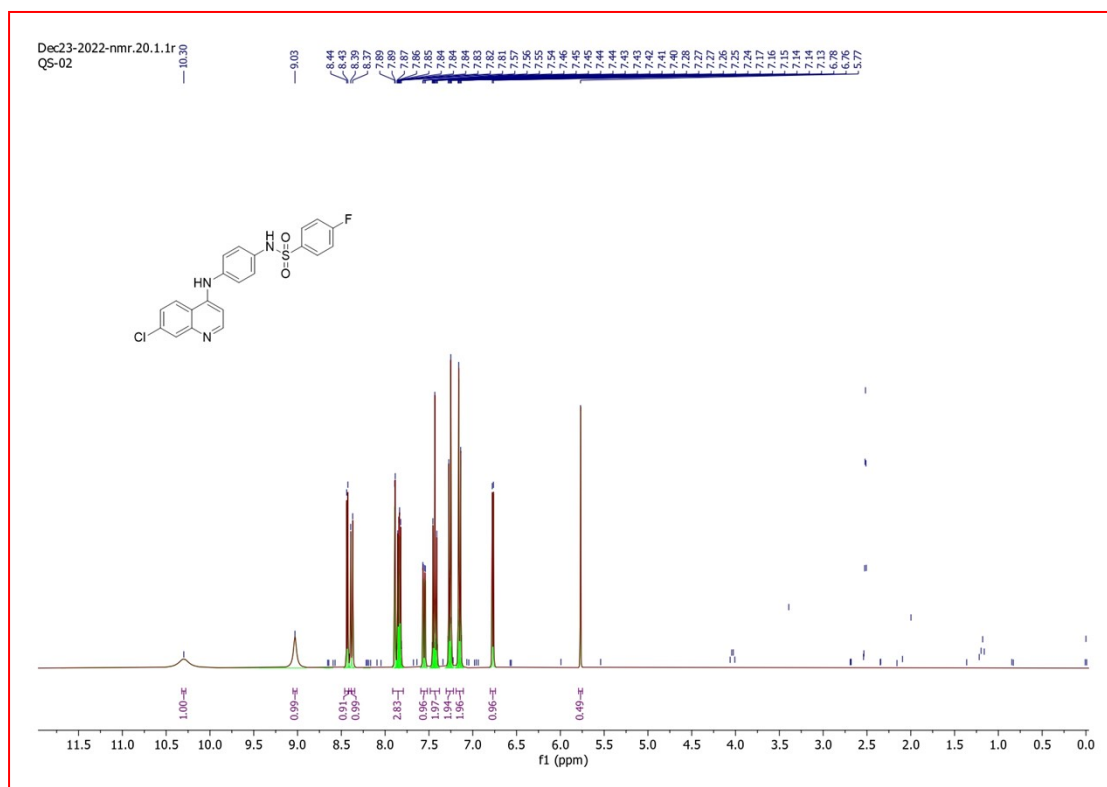

Figure-S3. <sup>1</sup>H NMR Spectrum of compound (QS-2)

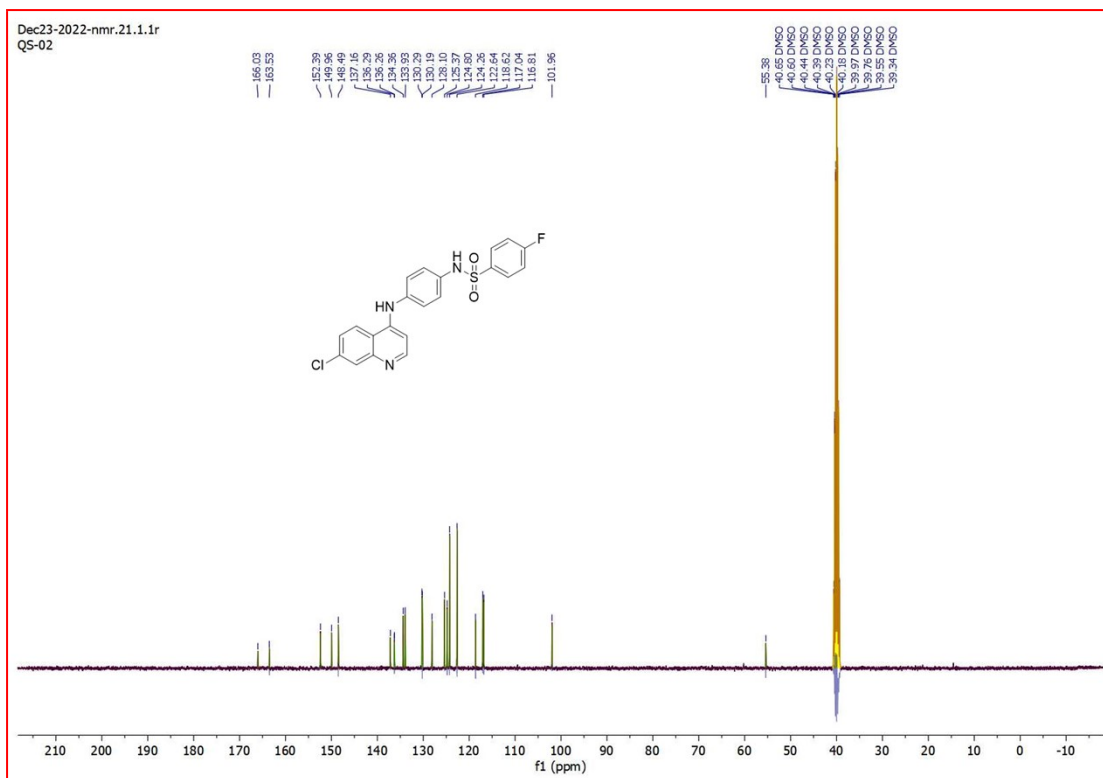

Figure-S4.  $^{13}\text{C}$  NMR Spectrum of compound (QS-2)

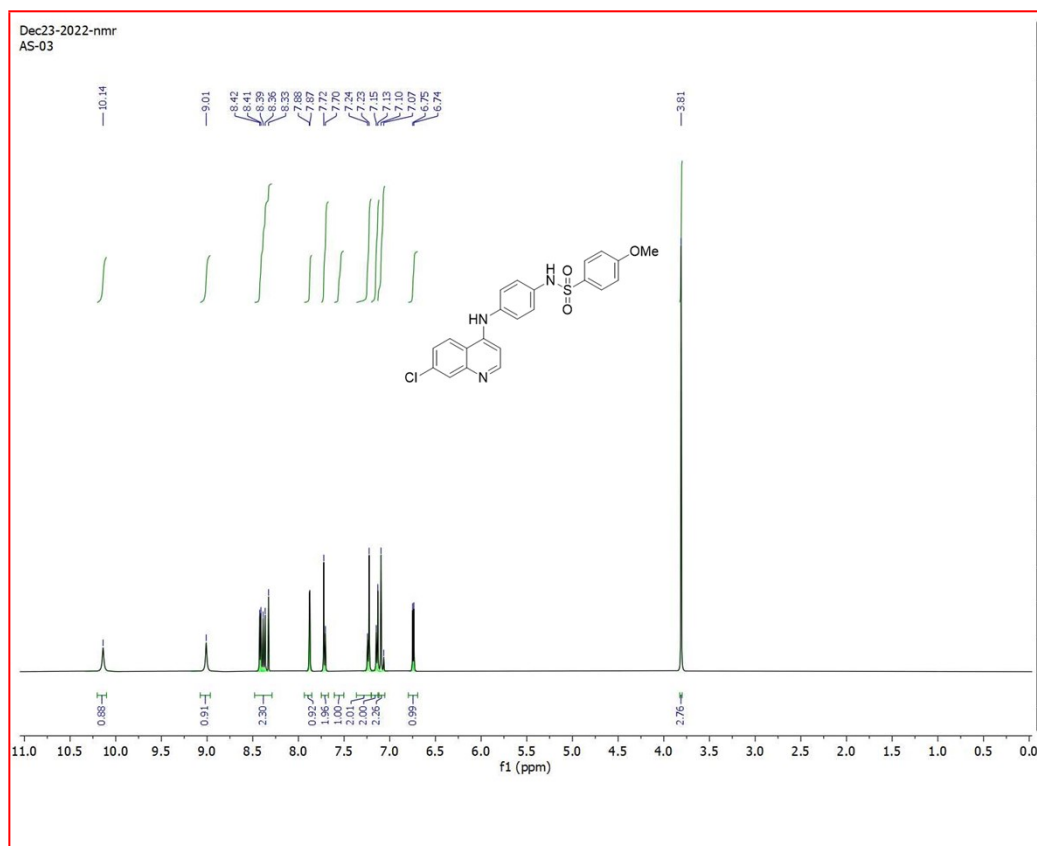

Figure-S5.  $^1\text{H}$  NMR Spectrum of compound (QS-3)

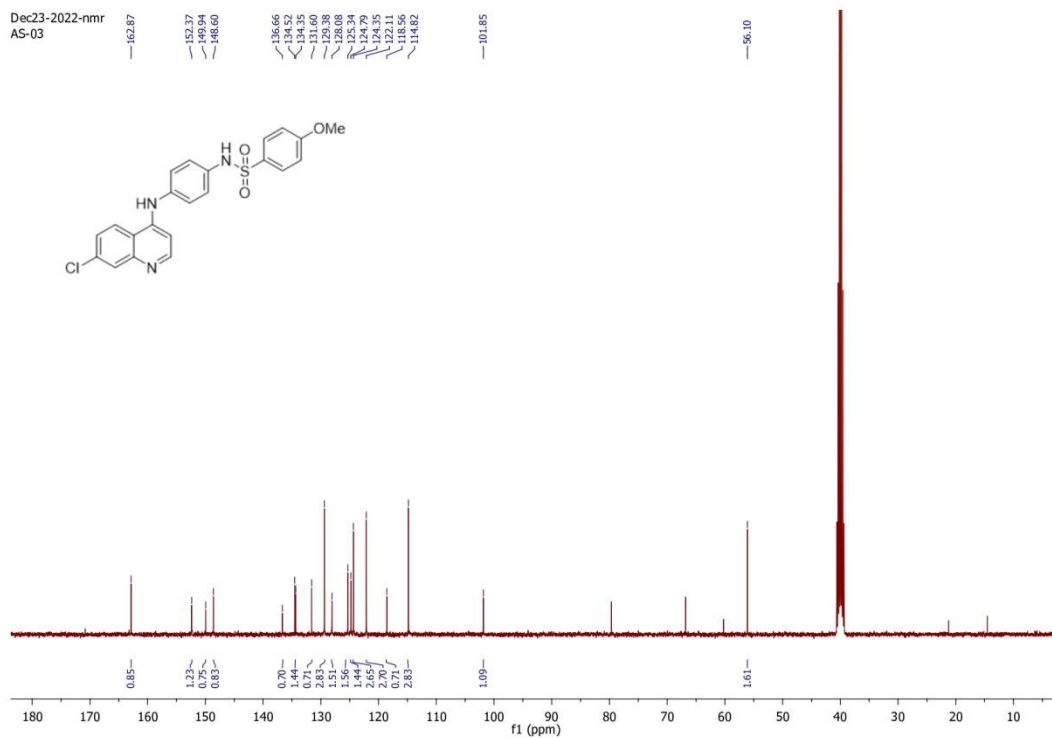

Figure-S6. <sup>13</sup>C NMR Spectrum of compound (QS-3)

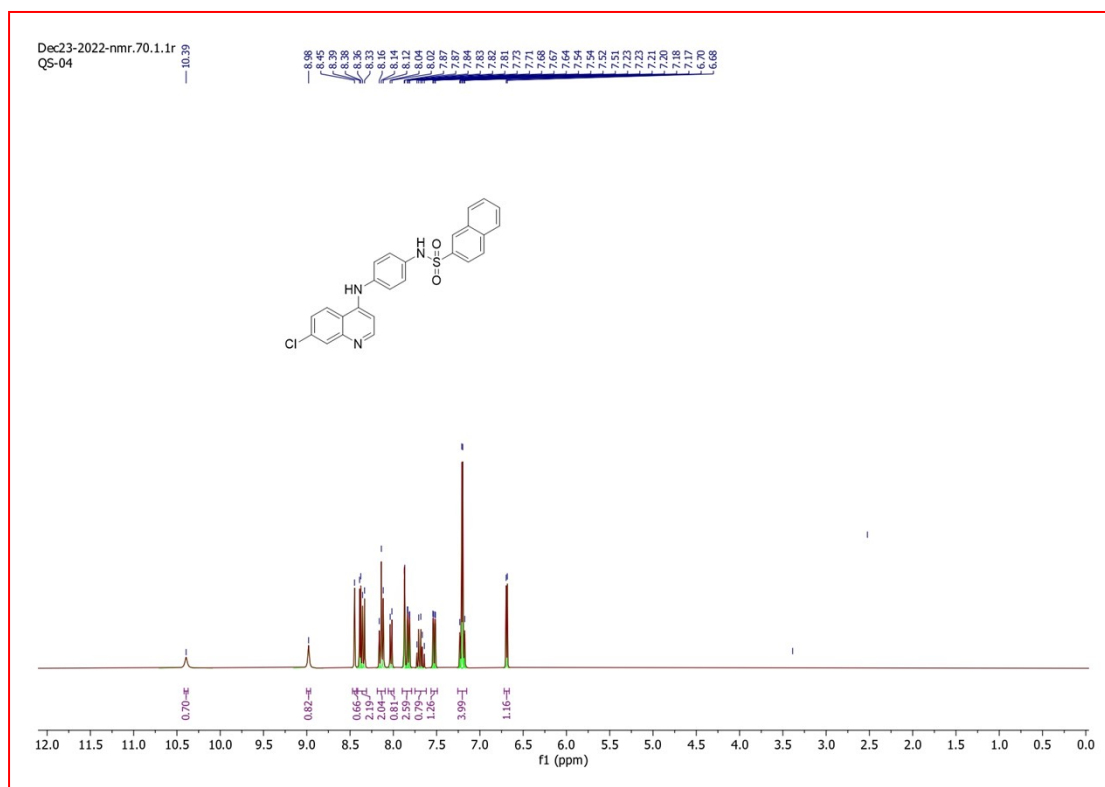

Figure.- S7. <sup>1</sup>H NMR Spectrum of compound (QS-4)

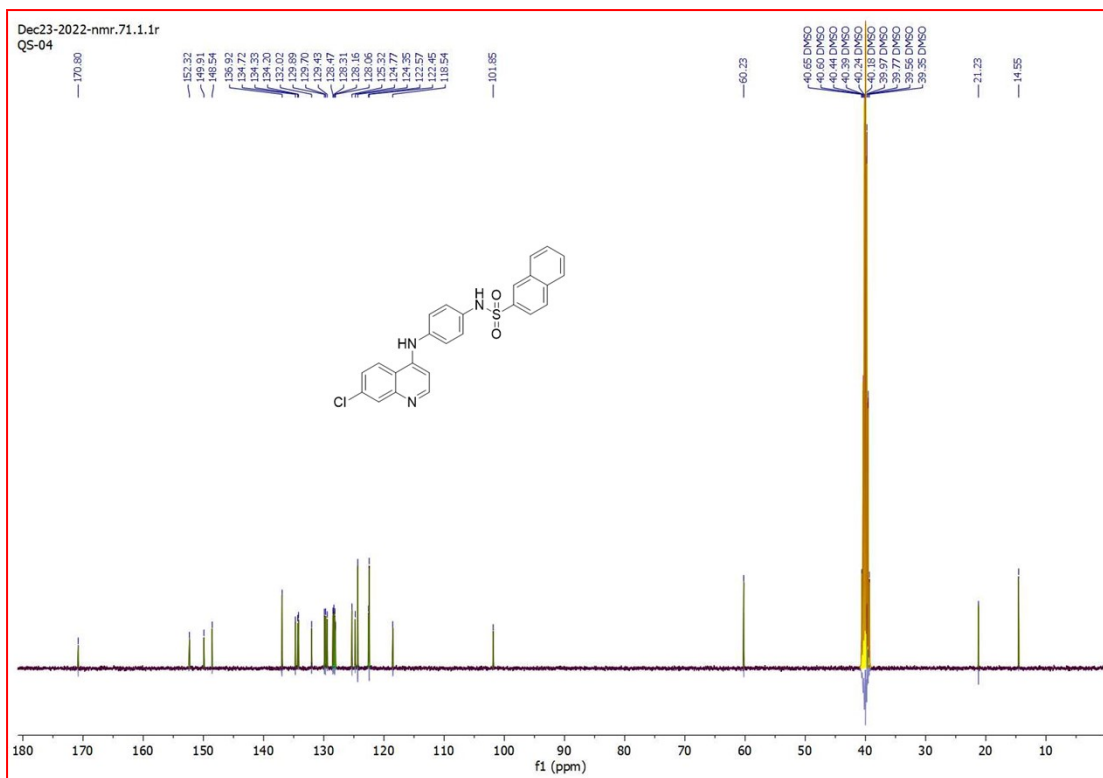

Figure.- S8. <sup>13</sup>C NMR Spectrum of compound (QS-4)

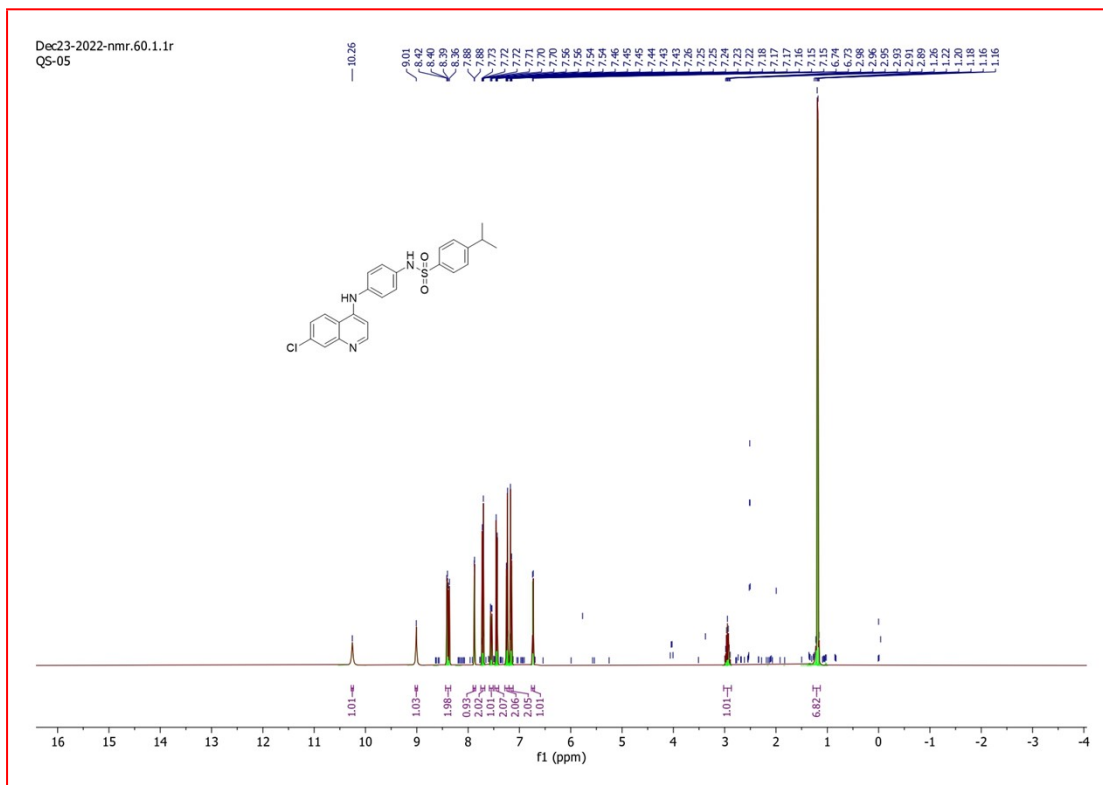

Figure.- S9. <sup>1</sup>H NMR Spectrum of compound (QS-5)



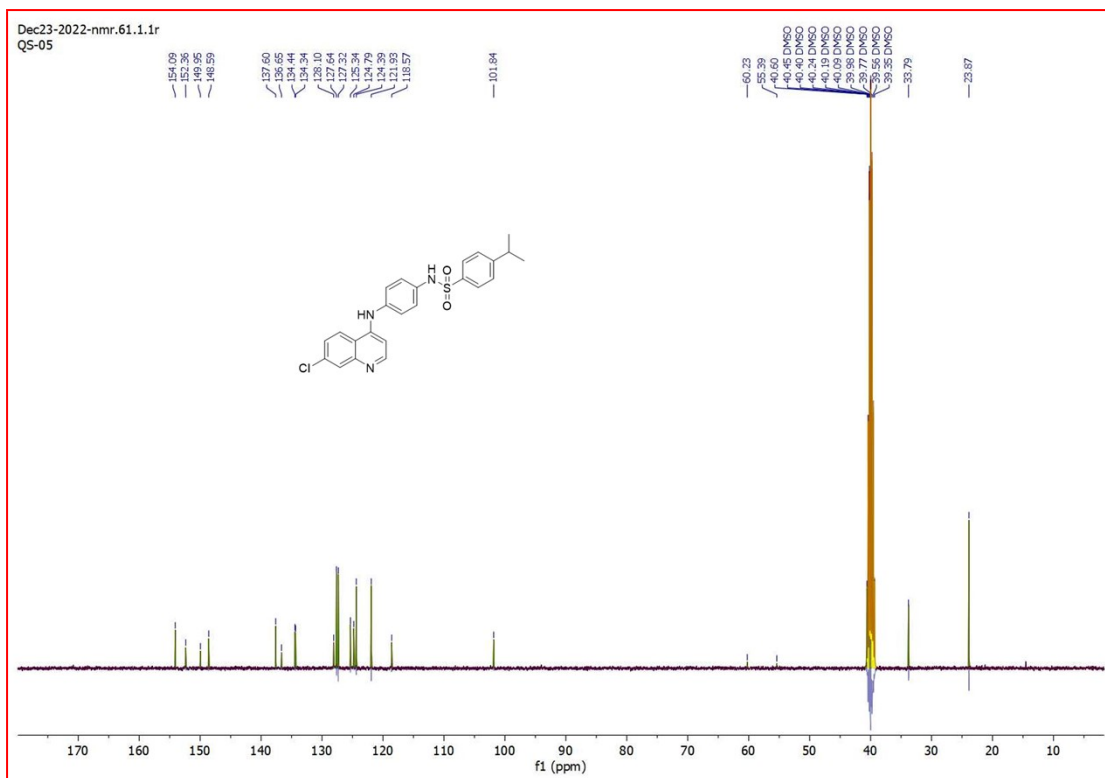

Figure.- S10. <sup>13</sup>C NMR Spectrum of compound (QS-5)

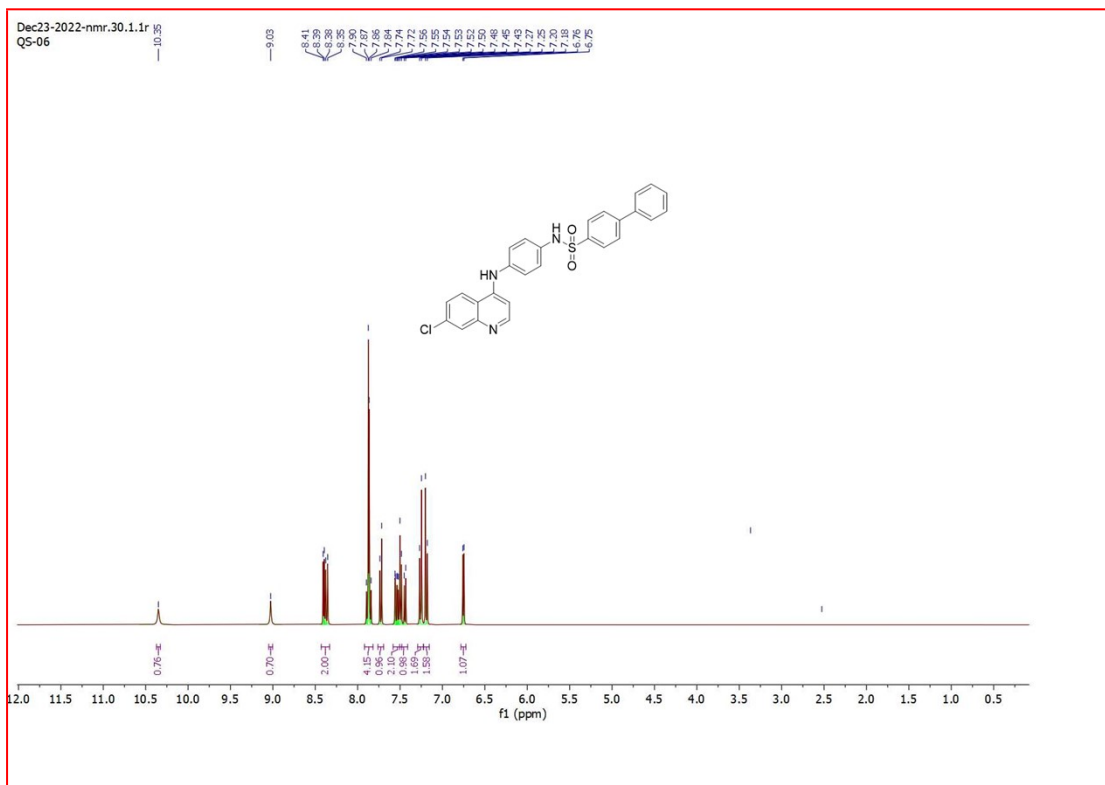

Figure.- S11. <sup>1</sup>H NMR Spectrum of compound (QS-6)

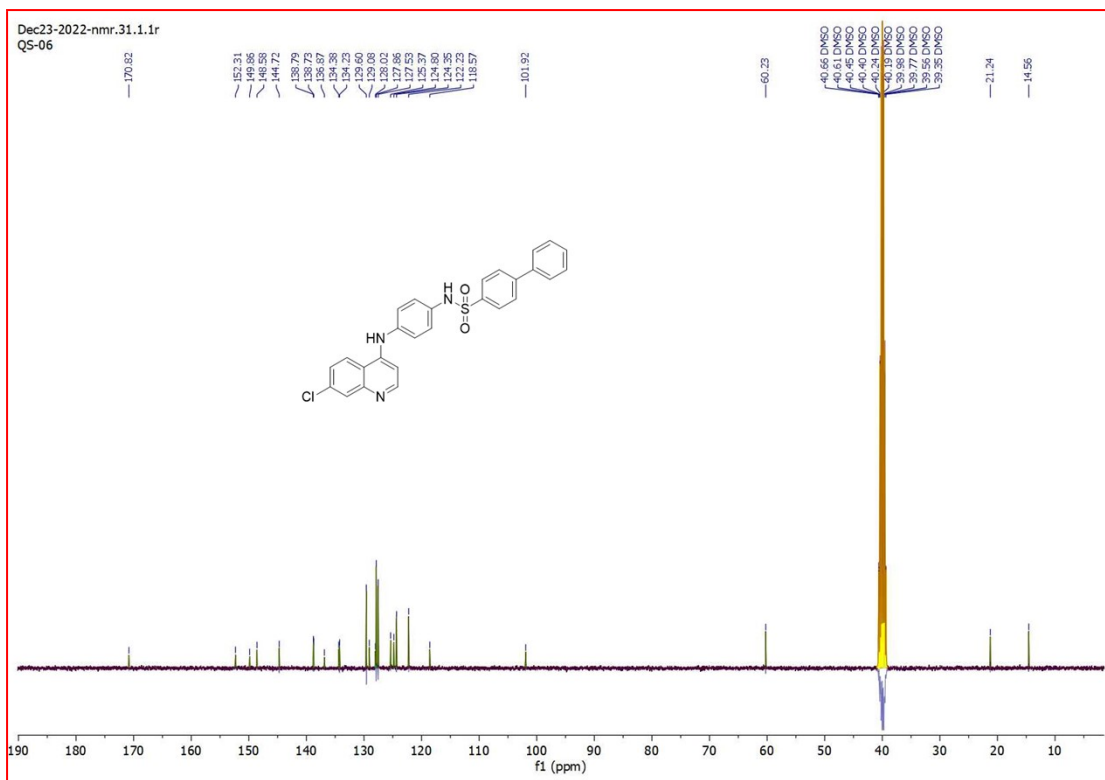

Figure.- S12. <sup>13</sup>C NMR Spectrum of compound (QS-6)

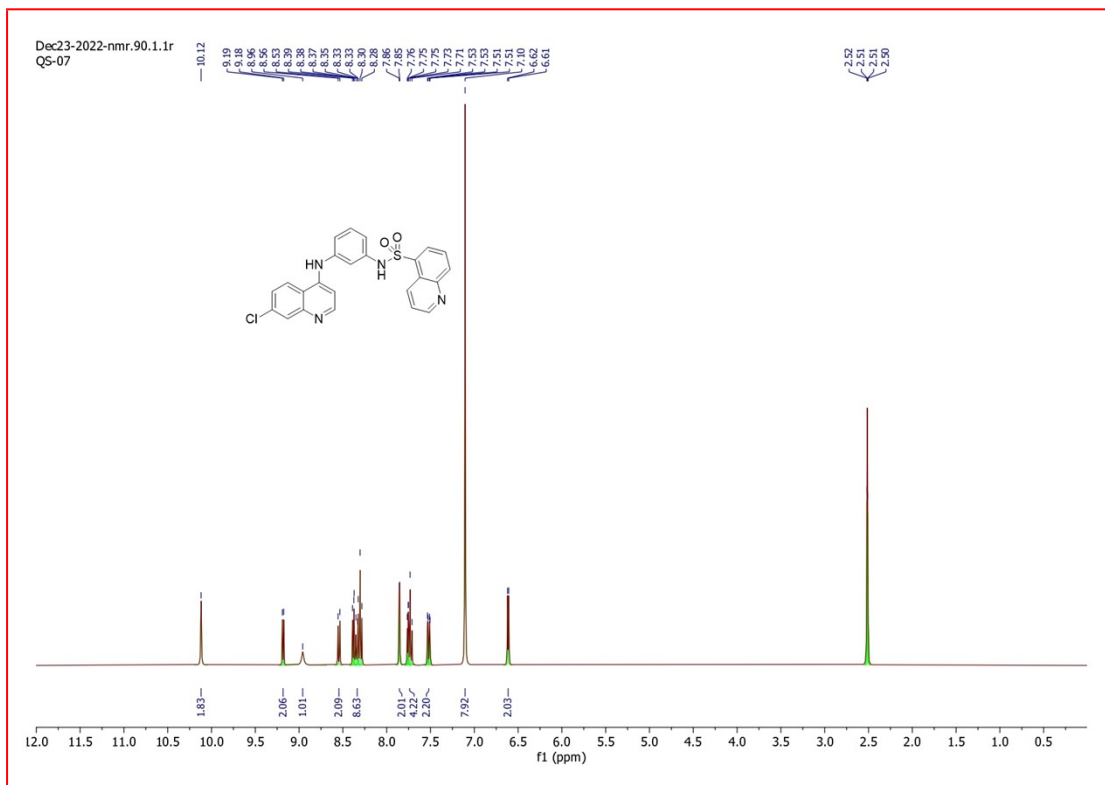

Figure.- S13. <sup>1</sup>H NMR Spectrum of compound (QS-7)

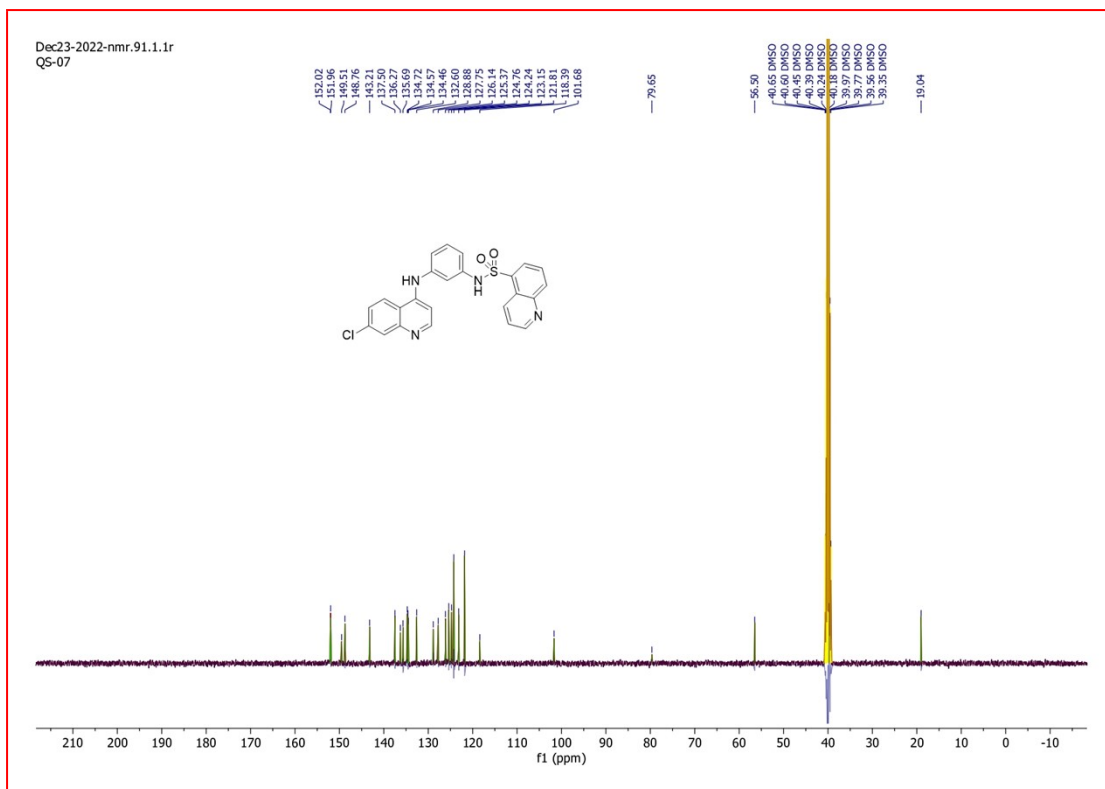

Figure.- S14. <sup>13</sup>C NMR Spectrum of compound (QS-7)

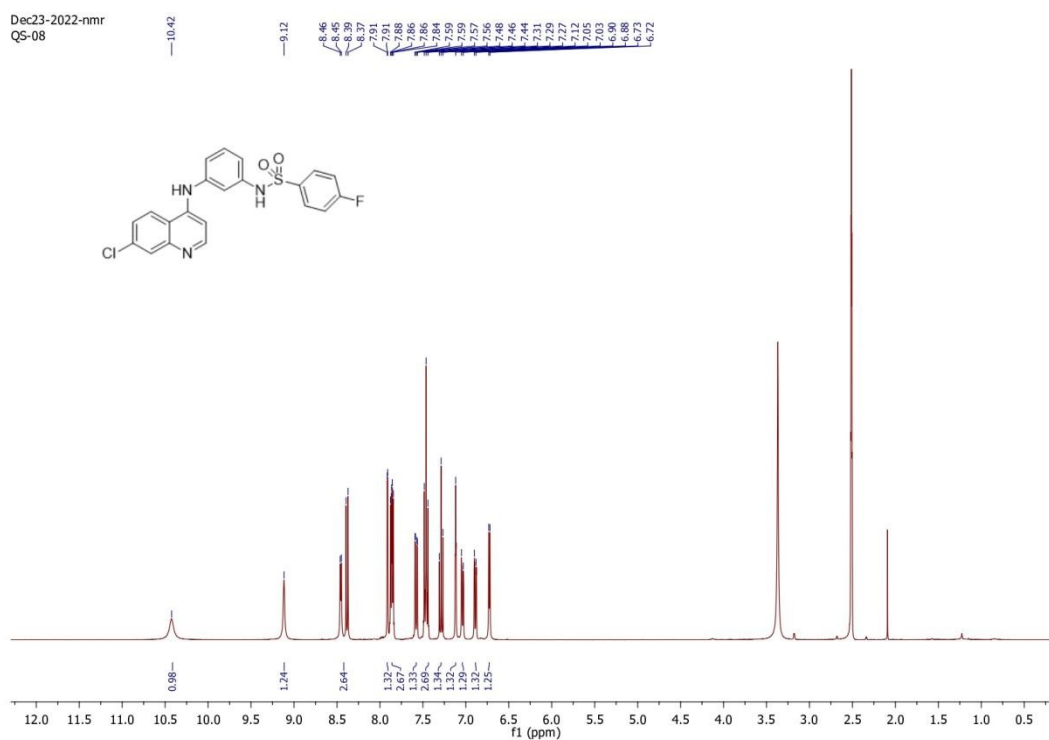

Figure.- S15. <sup>1</sup>H NMR Spectrum of compound (QS-8)

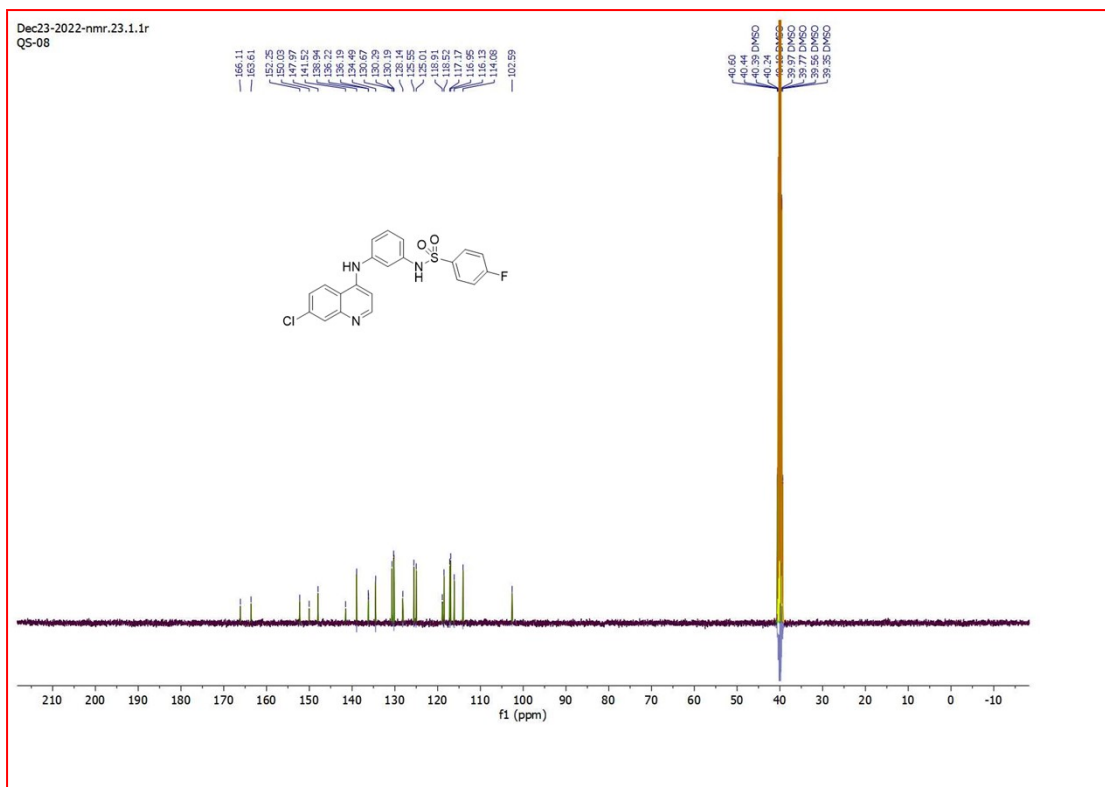

Figure.- S16.  $^{13}\text{C}$  NMR Spectrum of compound (QS-8)

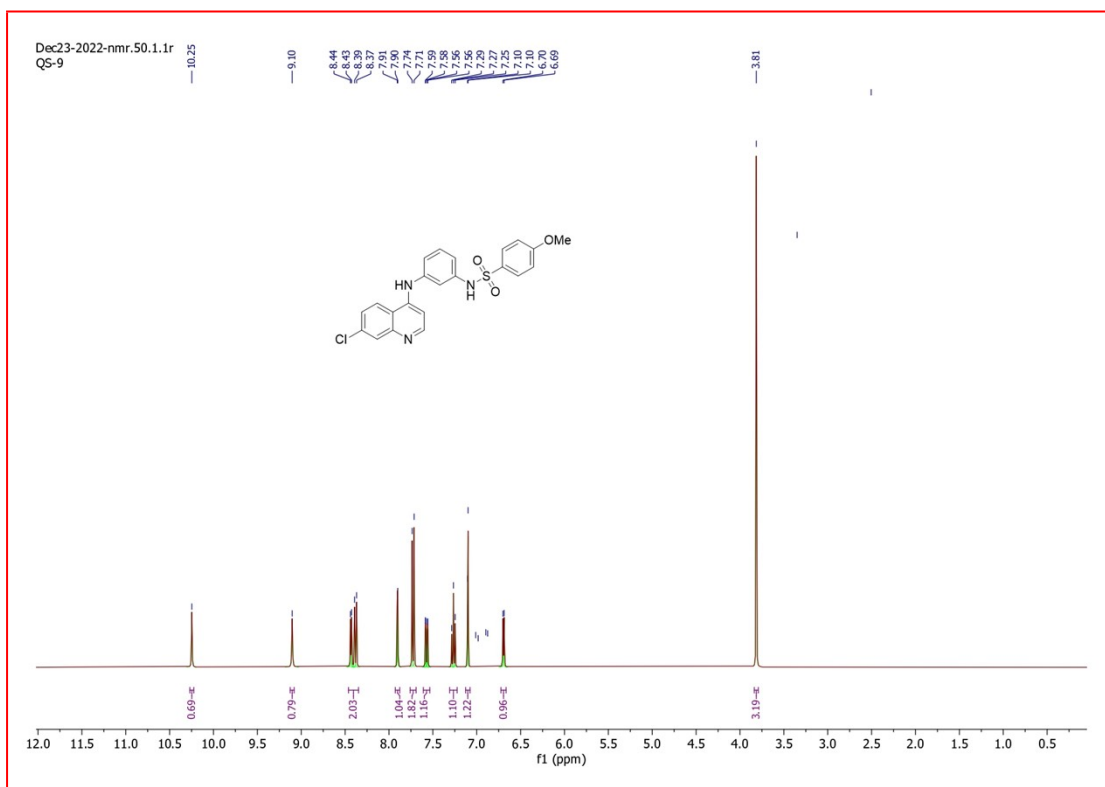

Figure.- S17.  $^1\text{H}$  NMR Spectrum of compound (QS-9)

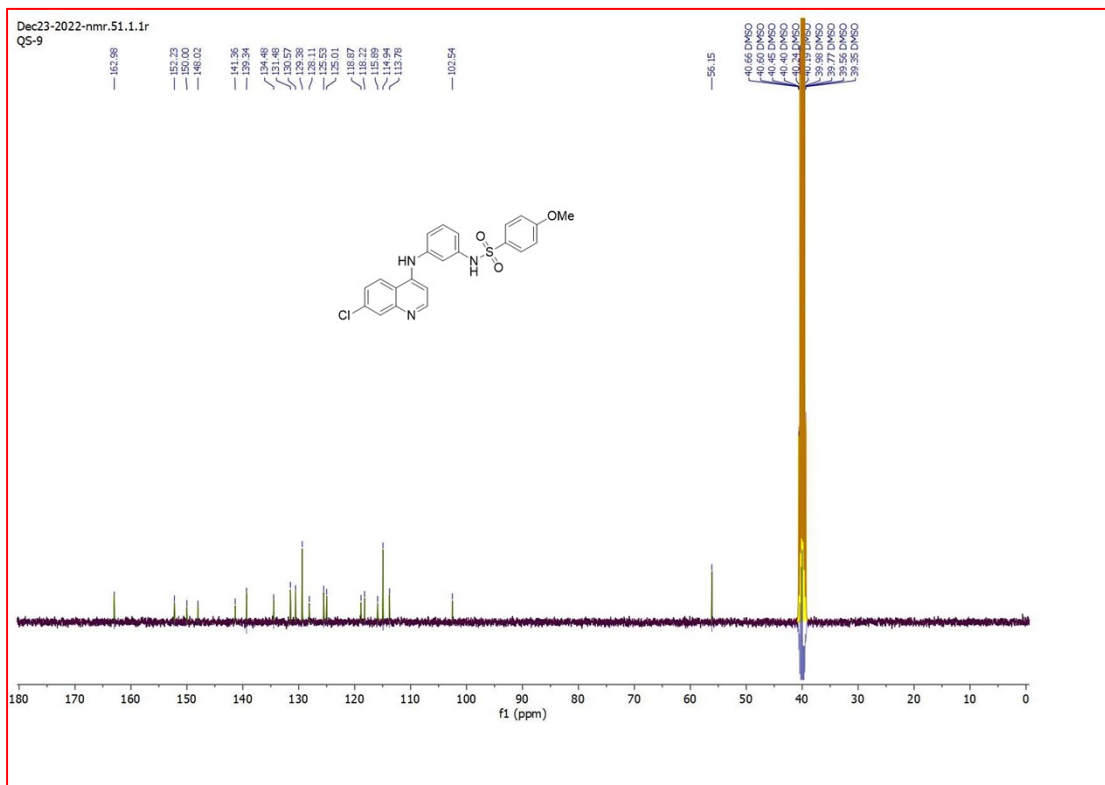

Figure.- S18.  $^{13}\text{C}$  NMR Spectrum of compound (QS-9)

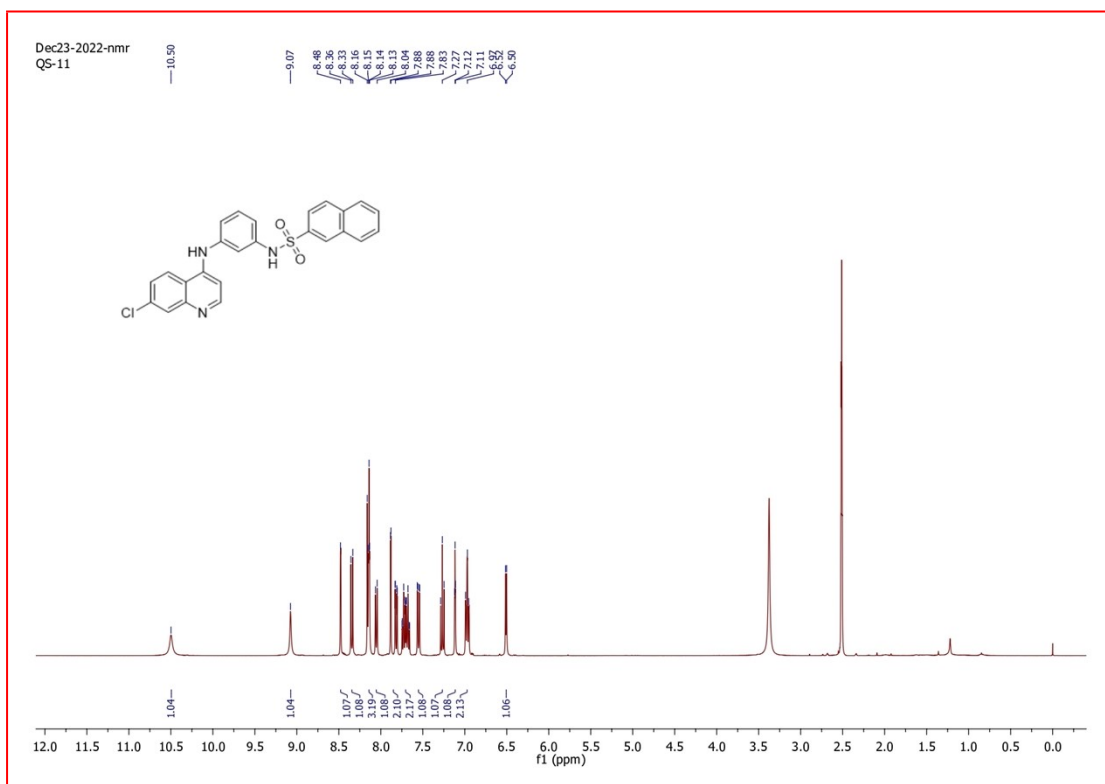

Figure.- S19.  $^1\text{H}$  NMR Spectrum of compound (QS-10)

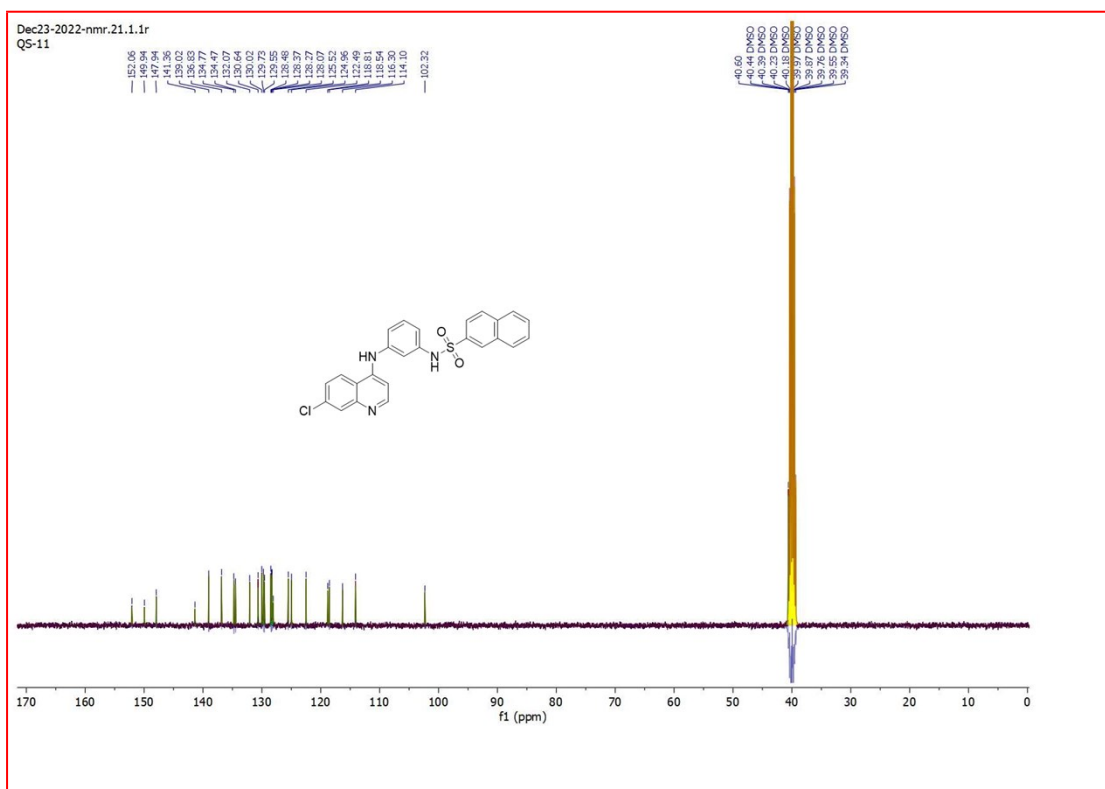

Figure.- S20. <sup>13</sup>C NMR Spectrum of compound (QS-10)

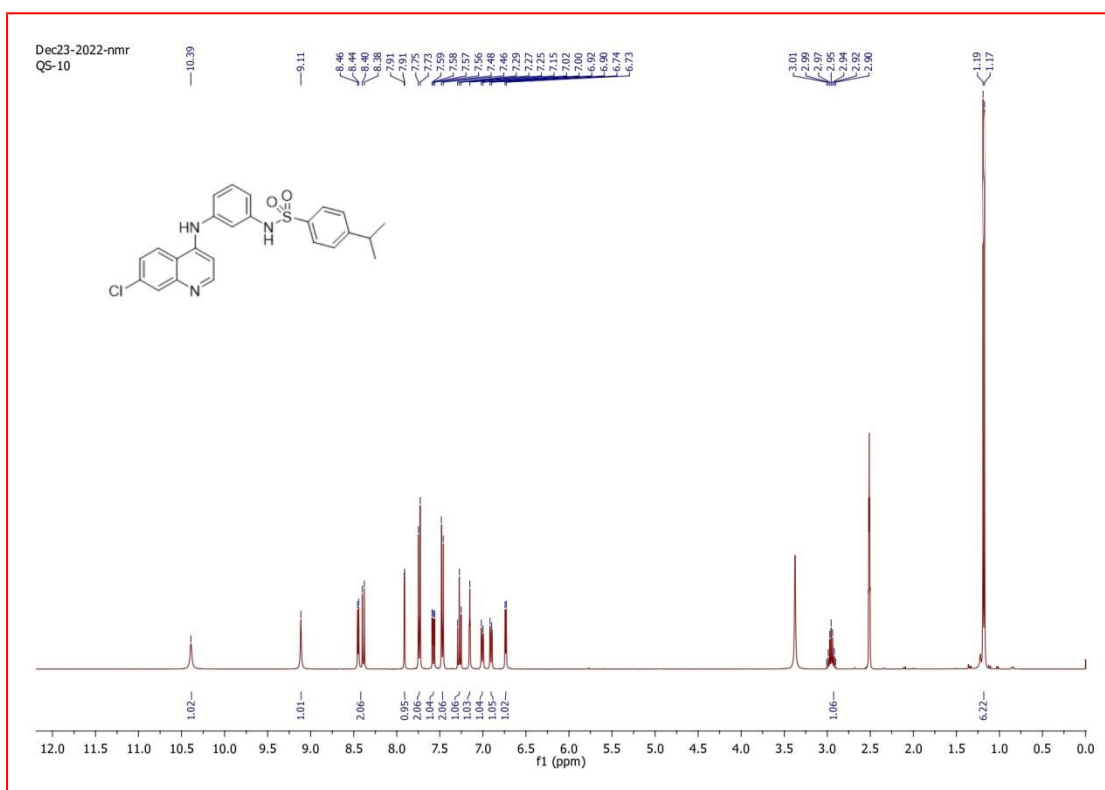

Figure.- S21. <sup>1</sup>H NMR Spectrum of compound (QS-11)

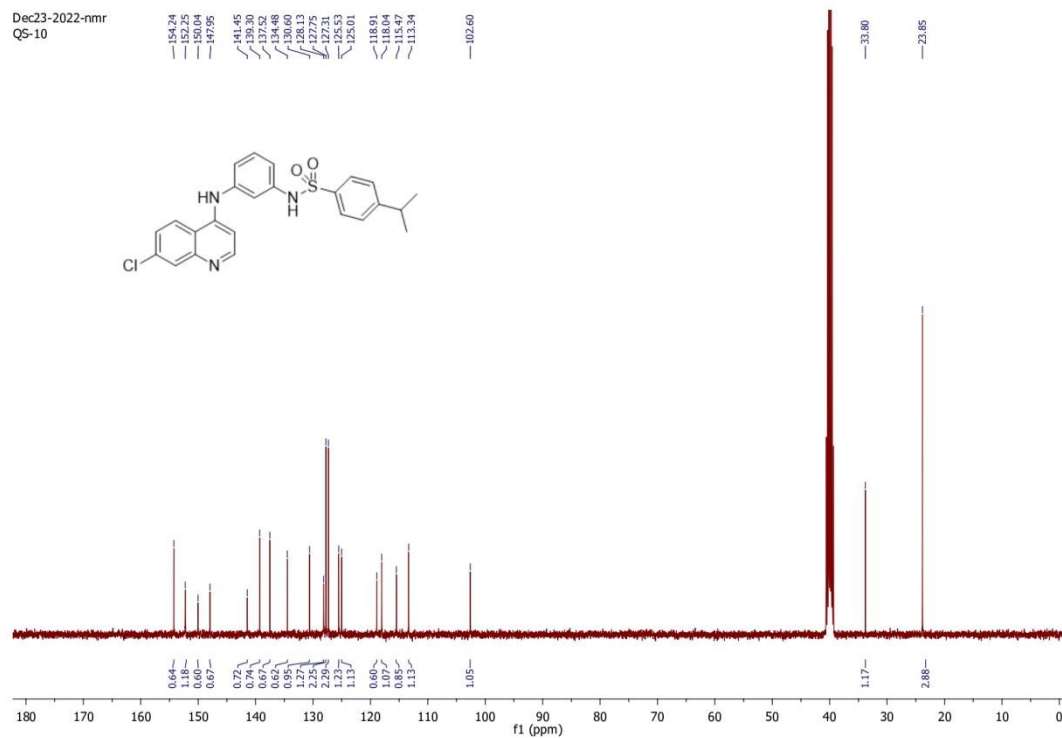

Figure.- S22. <sup>13</sup>C NMR Spectrum of compound (QS-11)

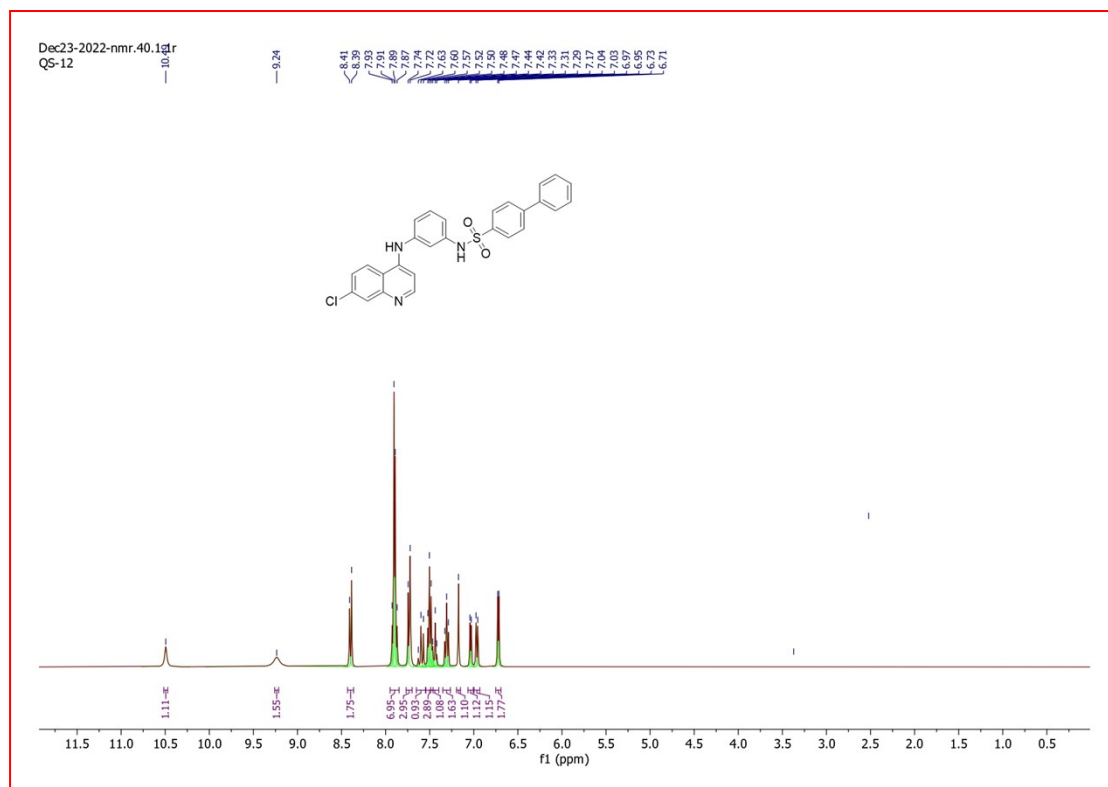

Figure.- S23. <sup>1</sup>H NMR Spectrum of compound (QS-12)

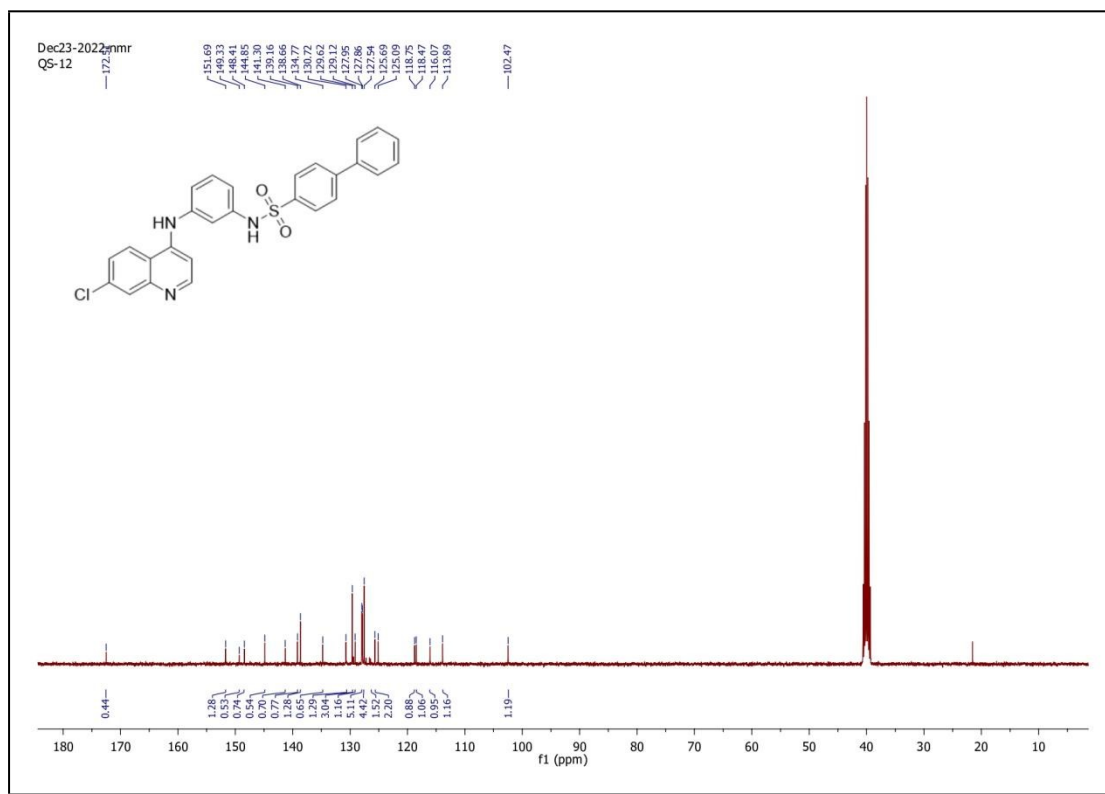

Figure - S24. <sup>13</sup>C NMR Spectrum of compound (QS-12)

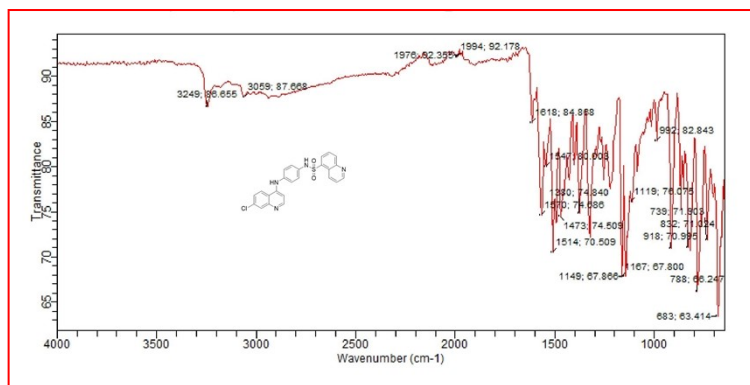

Figure - S25. FTIR Spectrum of compound (QS-1)



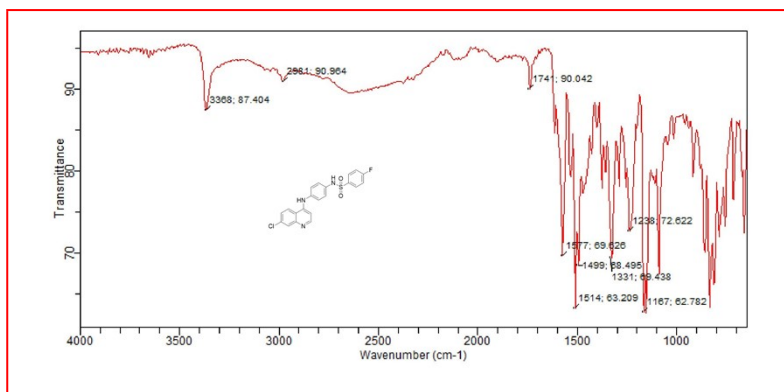

Figure - S26. FTIR Spectrum of compound (QS-2)

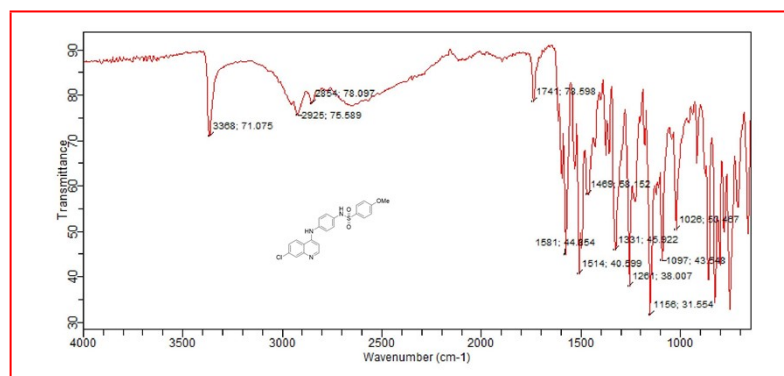

Figure - S27. FTIR Spectrum of compound (QS-3)

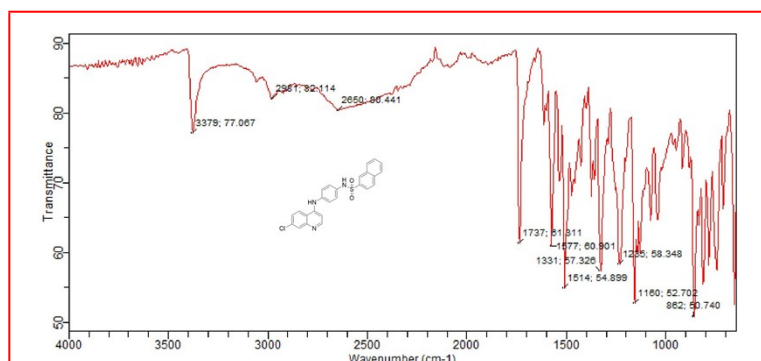

Figure - S28. FTIR Spectrum of compound (QS-4)

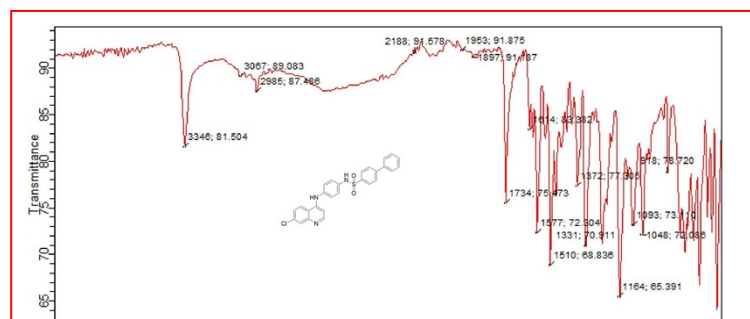

Figure - S29. FTIR Spectrum of compound (QS-5)

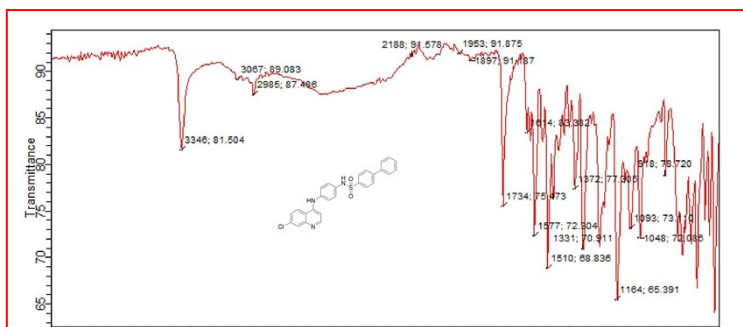

Figure - S30. FTIR Spectrum of compound (QS-6)

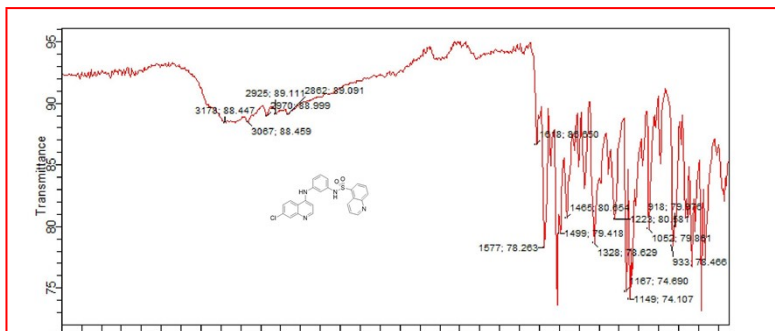

Figure - S31. FTIR Spectrum of compound (QS-7)

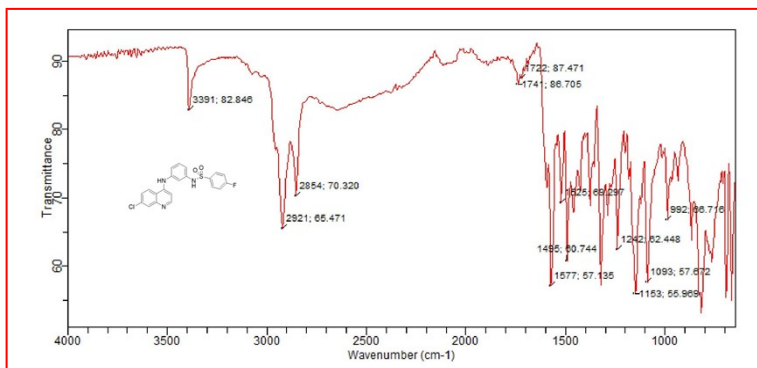

Figure - S32. FTIR Spectrum of compound (QS-8)

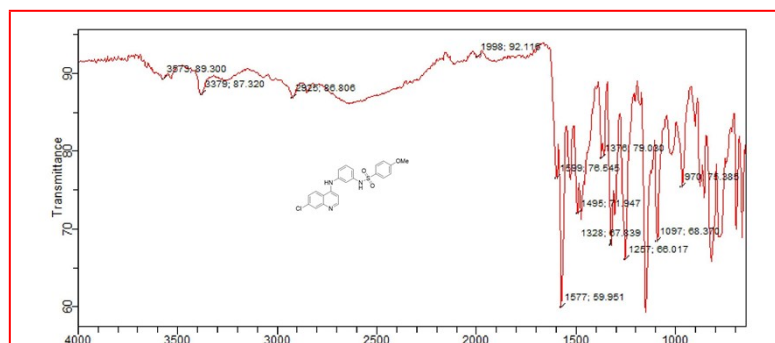

Figure - S33. FTIR Spectrum of compound (QS-9)

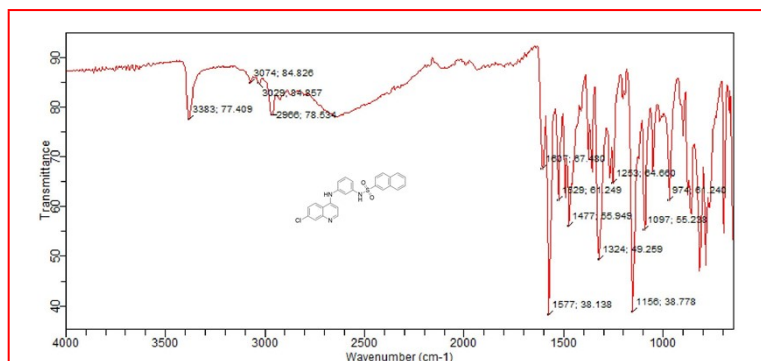

Figure - S34. FTIR Spectrum of compound (QS-10)

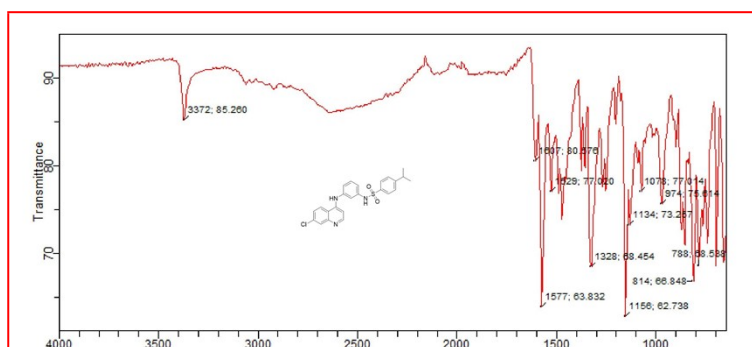

Figure - S35. FTIR Spectrum of compound (QS-11)

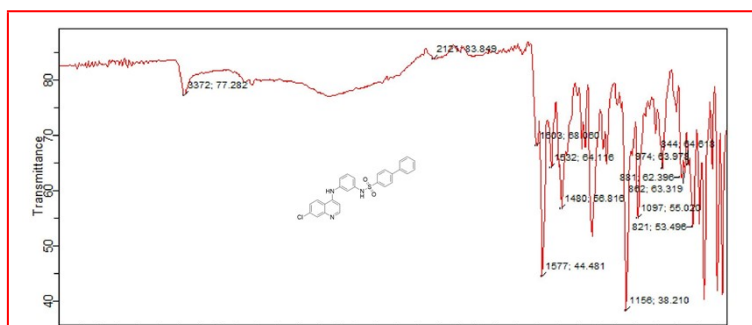

Figure - S36. FTIR Spectrum of compound (QS-12)

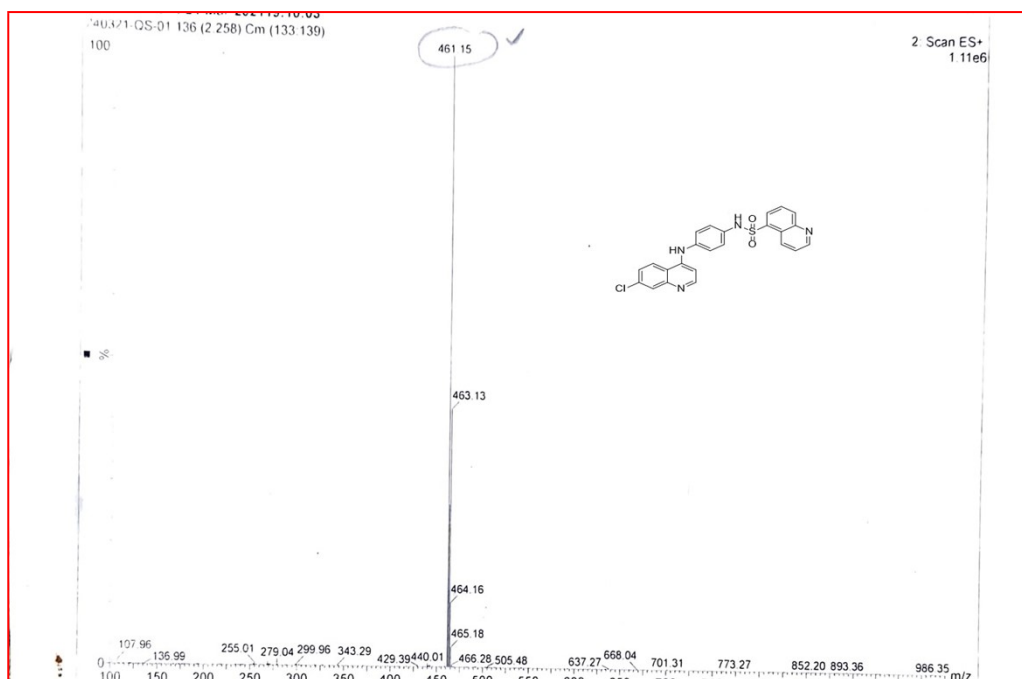

Figure - S37. Mass spectrum of compound (QS-1)

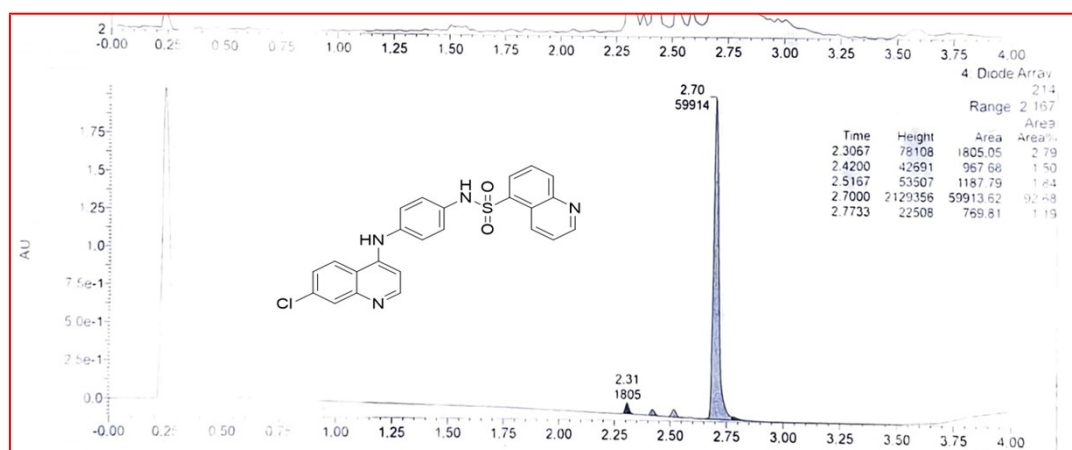

Figure - S38. Purity of compound (QS-1)

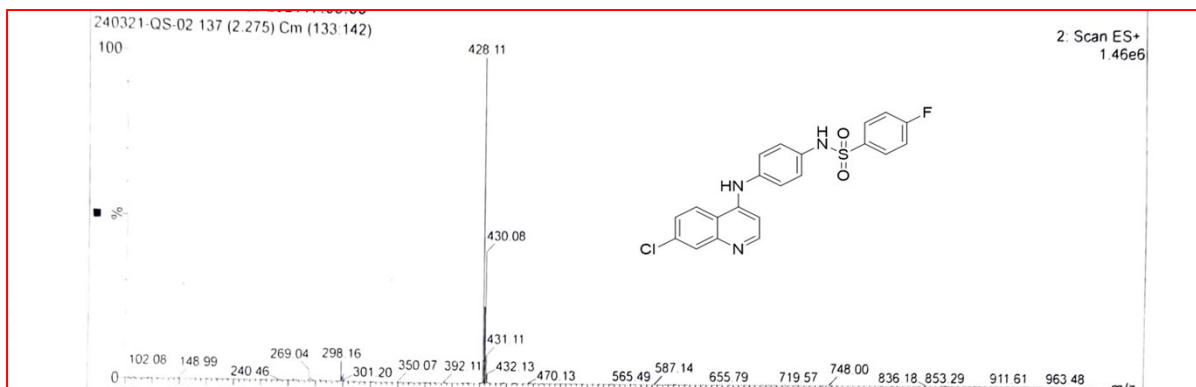

Figure - S39. Mass spectrum of compound (QS-2)

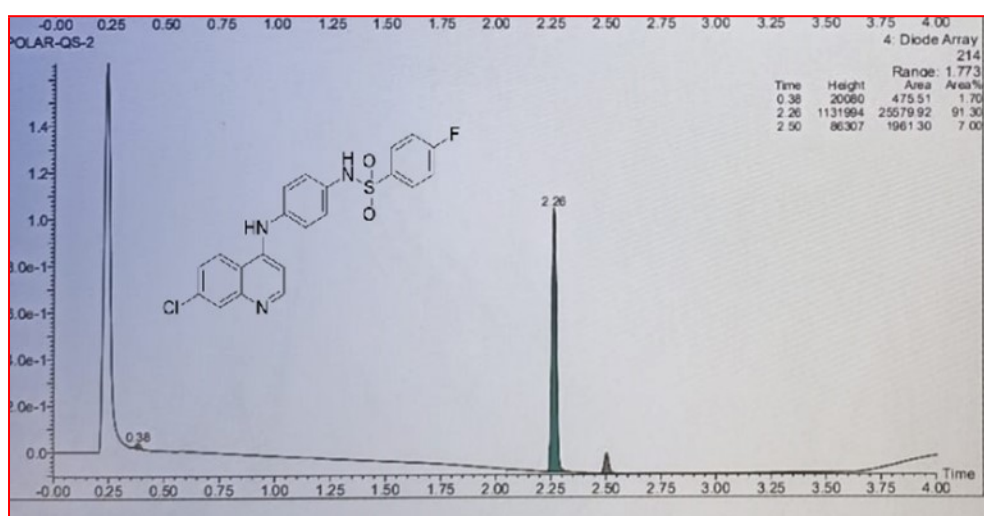

Figure - S40. Purity of compound (QS-2)

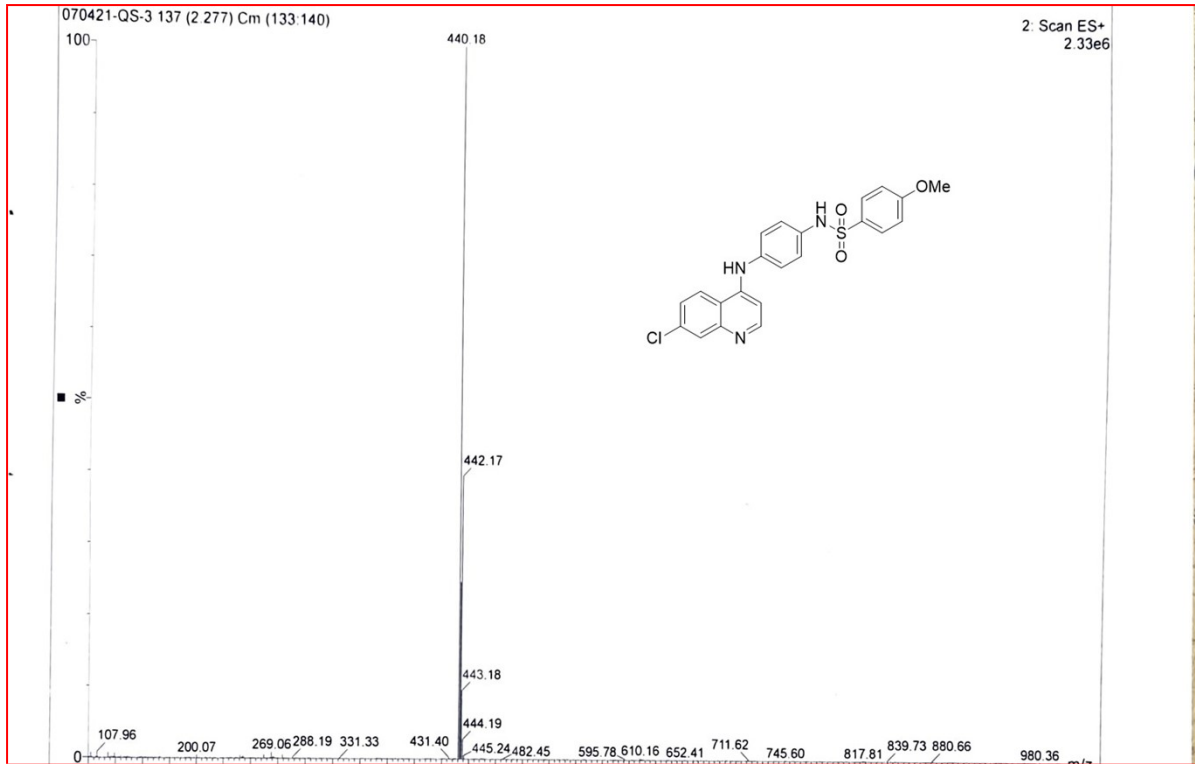

Figure - S41. Mass spectrum of compound (QS-3)

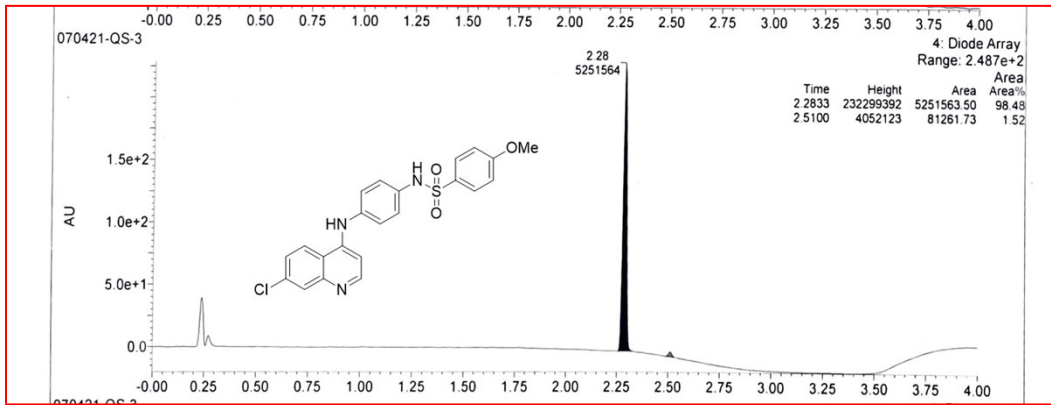

Figure - S42. Purity of compound (QS-3)

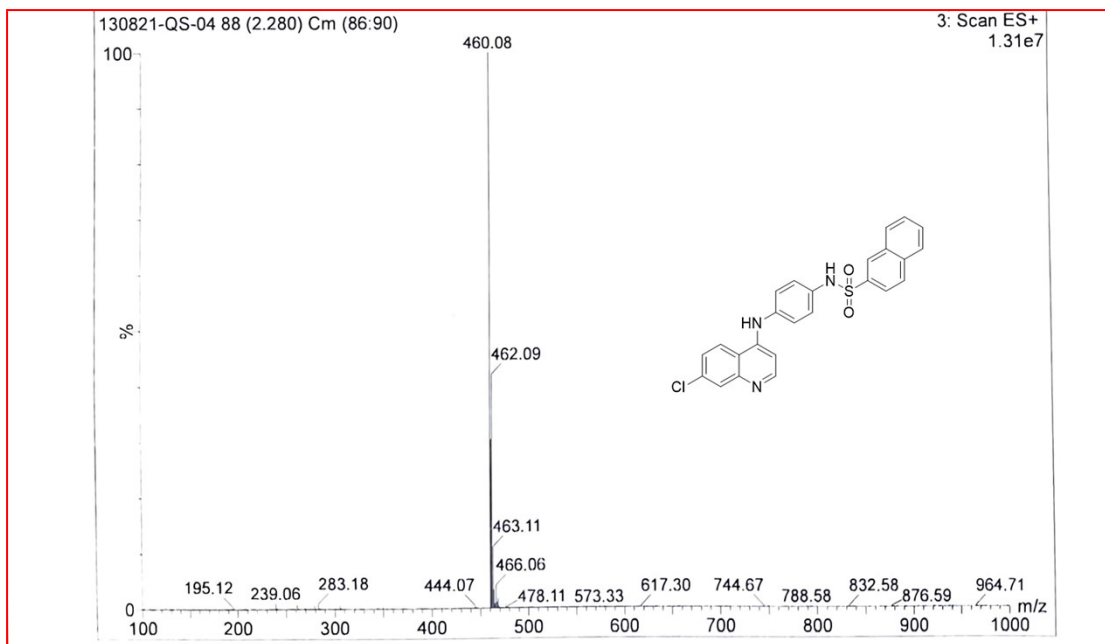

Figure - S43. Mass spectrum of compound (QS-4)

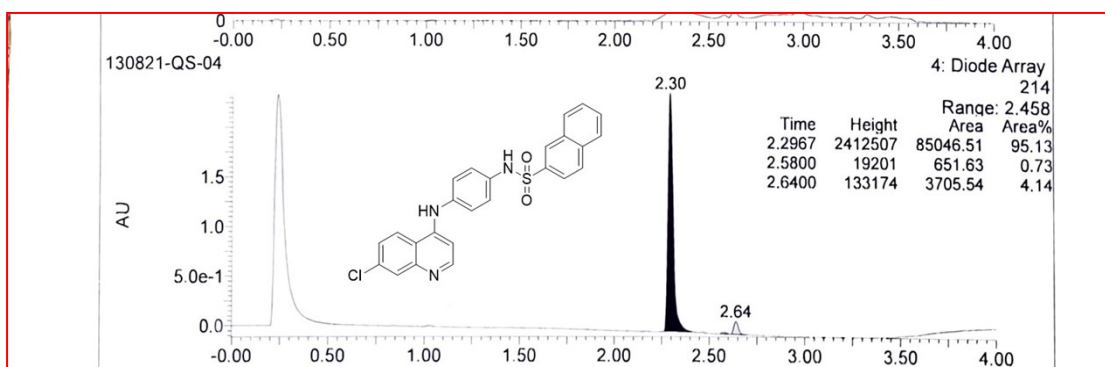

Figure - S44. Purity of compound (QS-4)

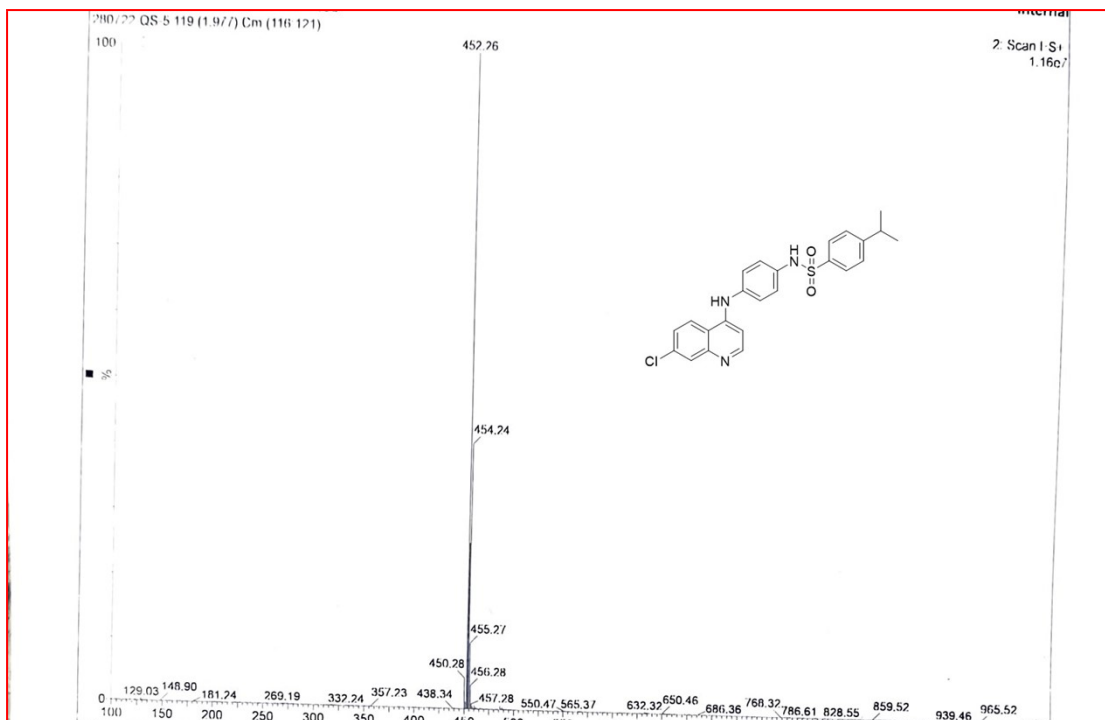

Figure - S45. Mass spectrum of compound (QS-5)

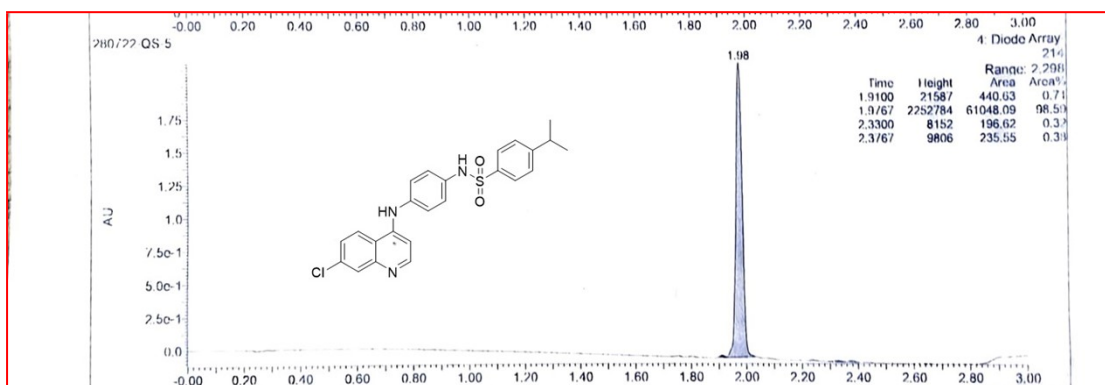

Figure - S46. Purity of compound (QS-5)



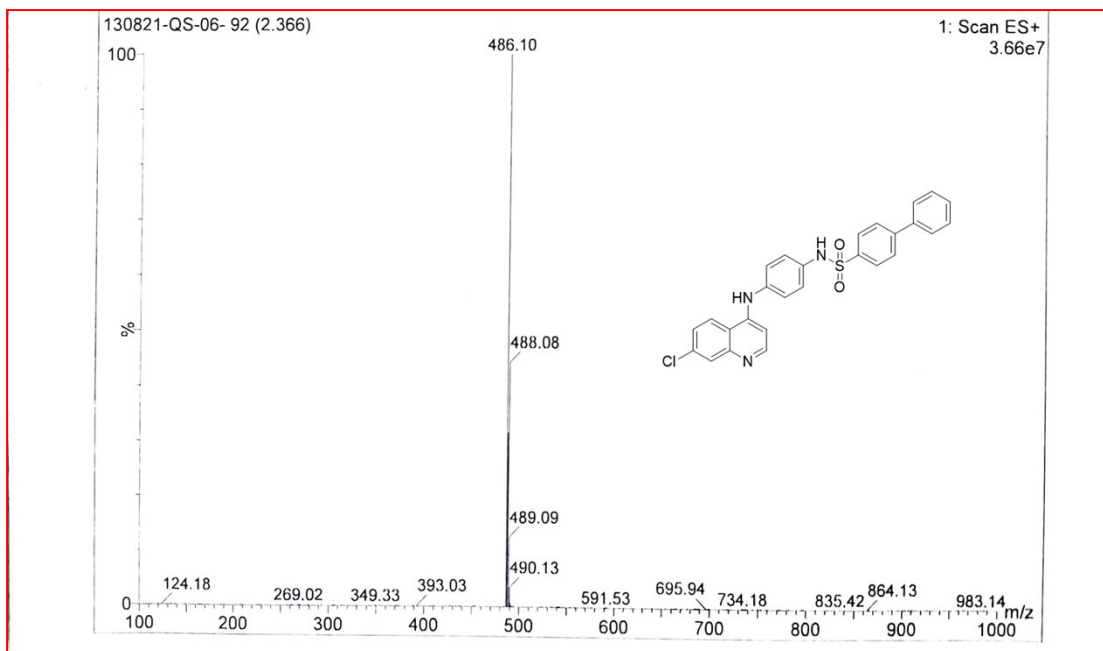

Figure - S47. Mass spectrum of compound (QS-6)

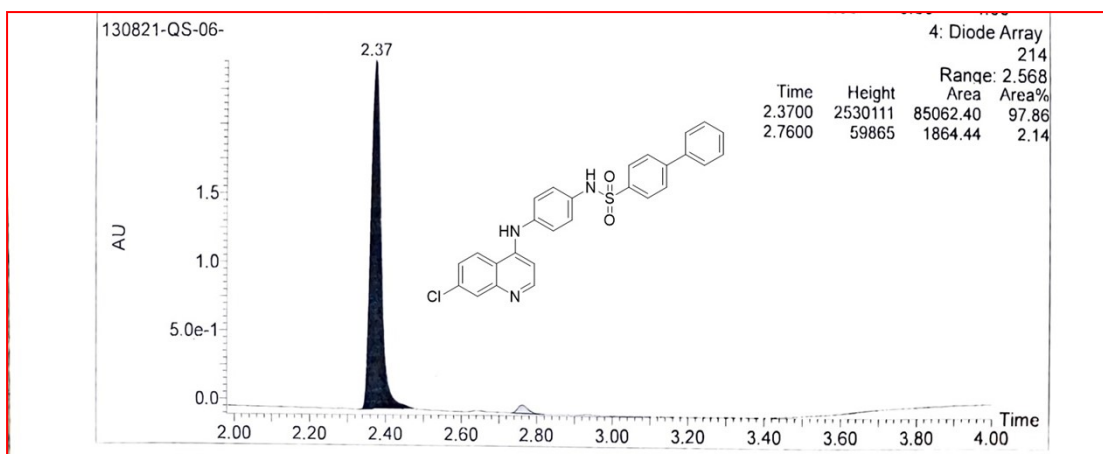

Figure - S48. Purity of compound (QS-6)

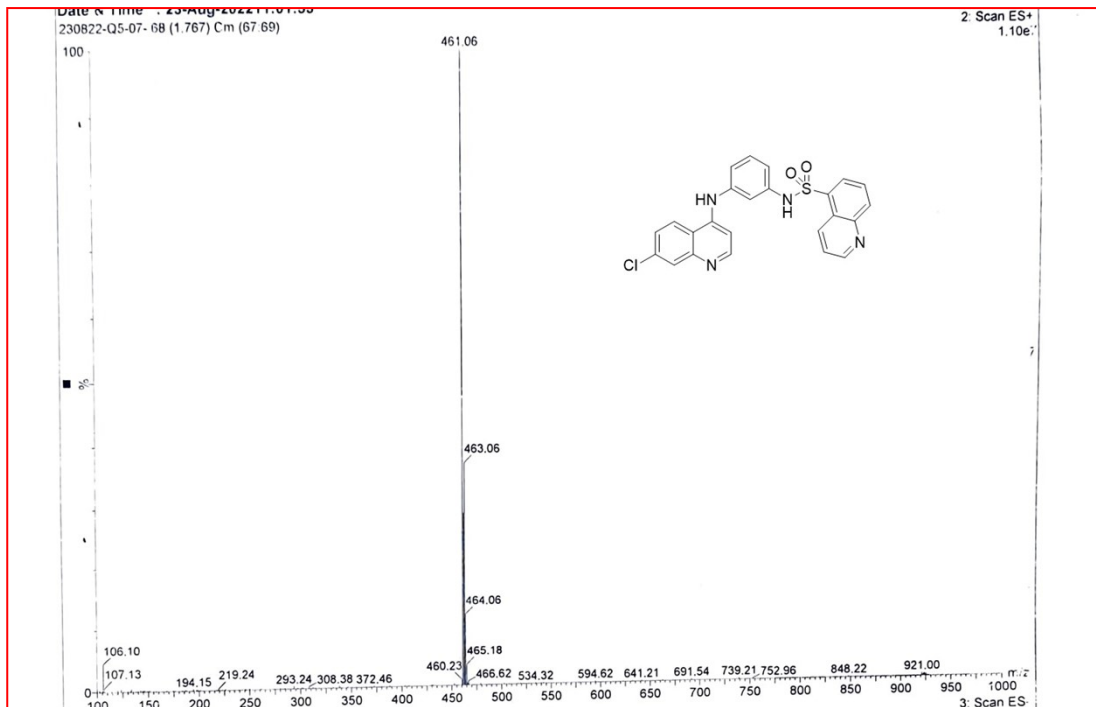

Figure - S49. Mass spectrum of compound (QS-7)

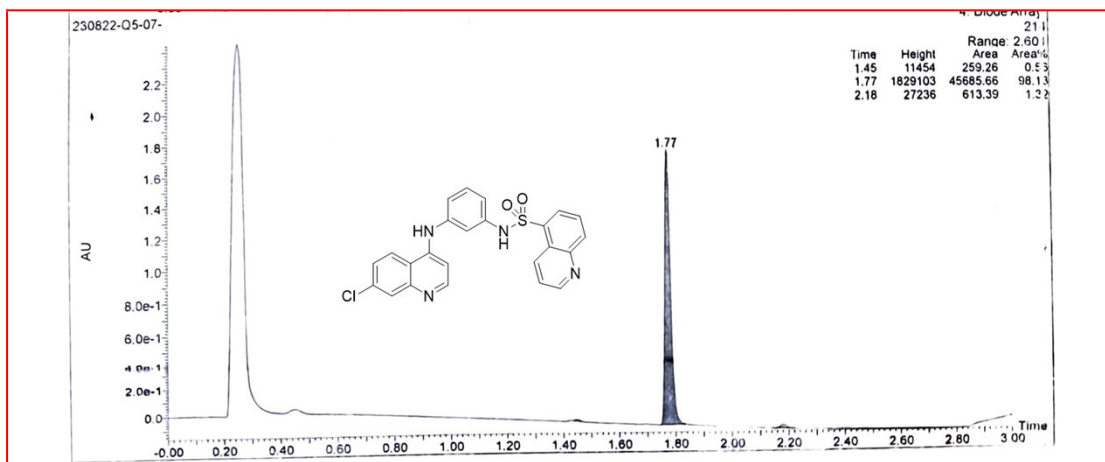

Figure - S50. Purity of compound (QS-7)

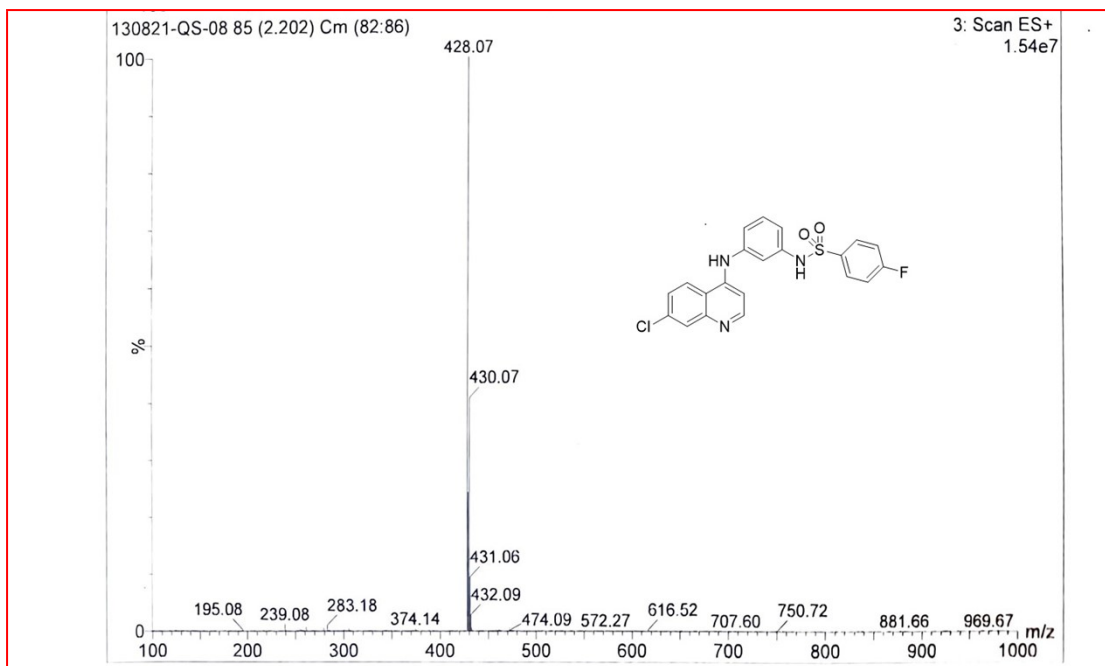

Figure - S51. Mass spectrum of compound (QS-8)

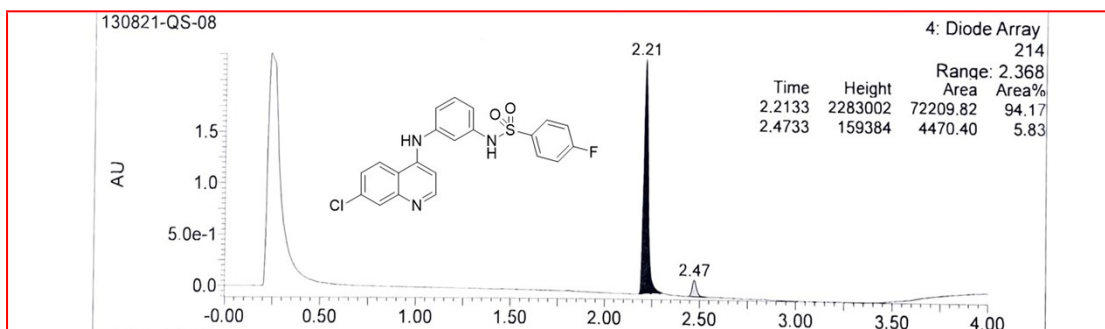

Figure - S52. Purity of compound (QS-8)

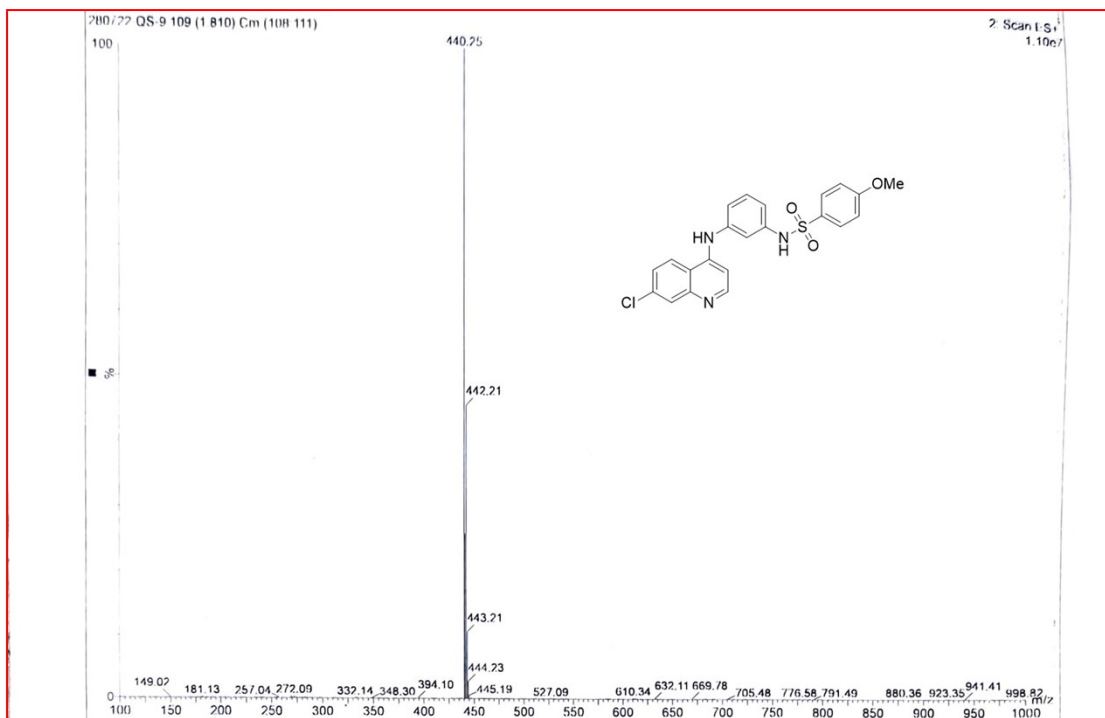

Figure - S53. Mass spectrum of compound (QS-9)

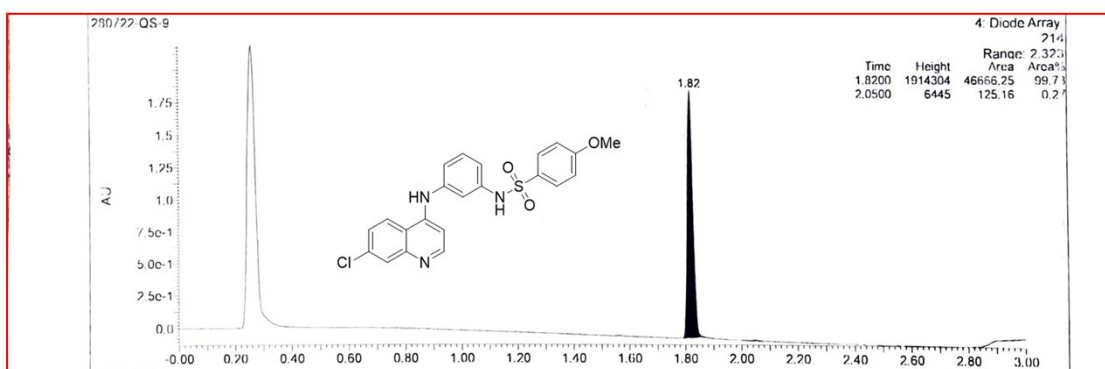

Figure - S54. Purity of compound (QS-9)

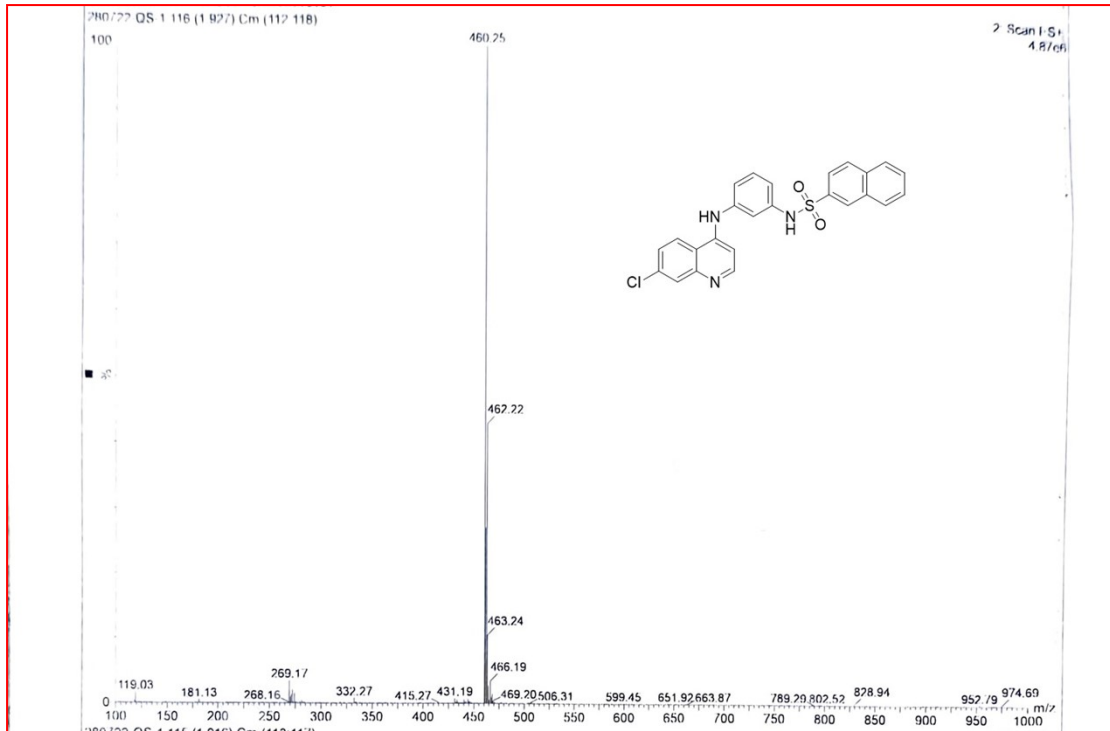

Figure - S55. Mass spectrum of compound (QS-10)

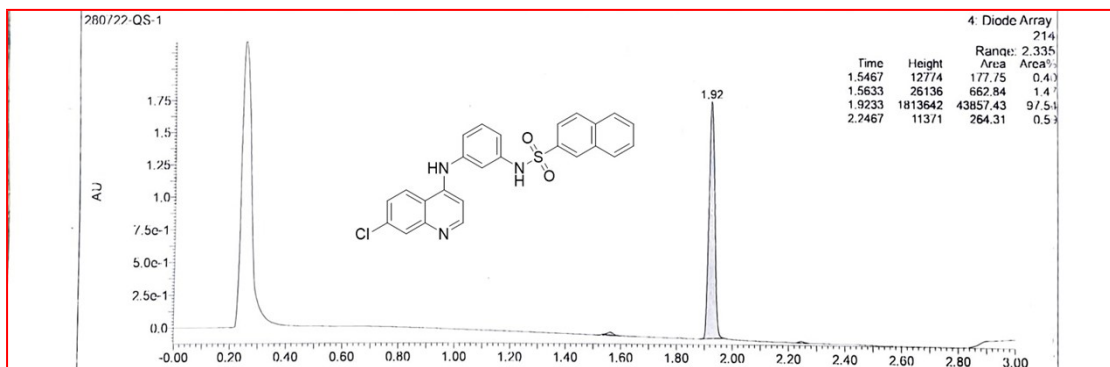

Figure - S56. Purity of compound (QS-10)

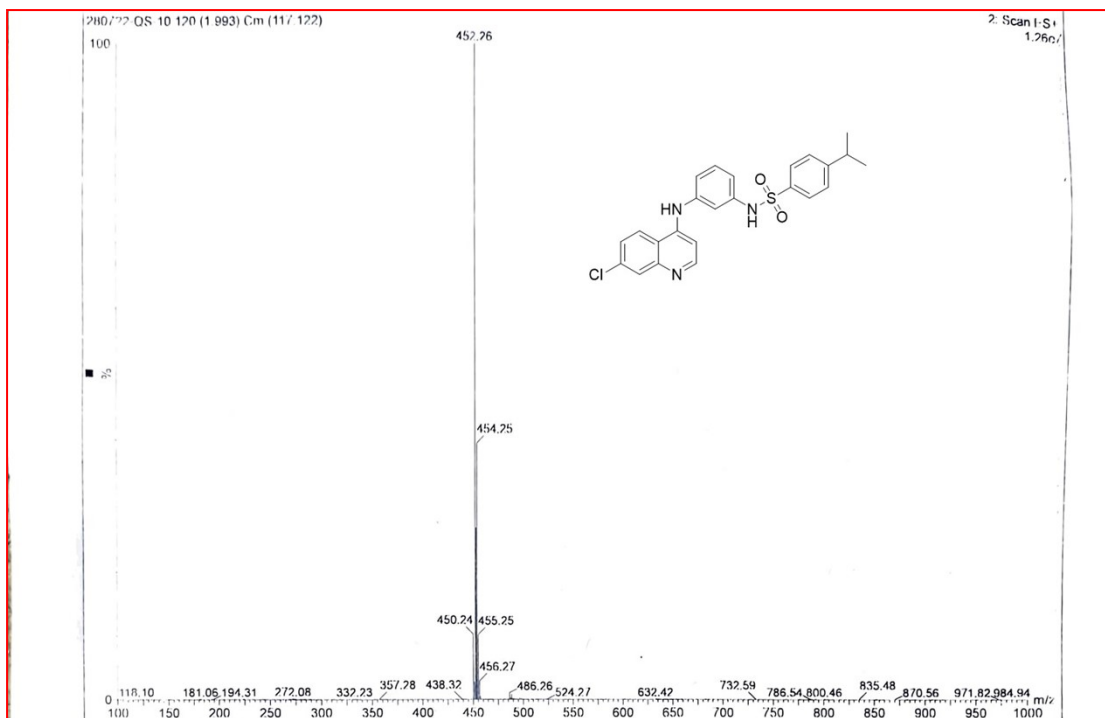

Figure - S57. Mass spectrum of compound (QS-11)

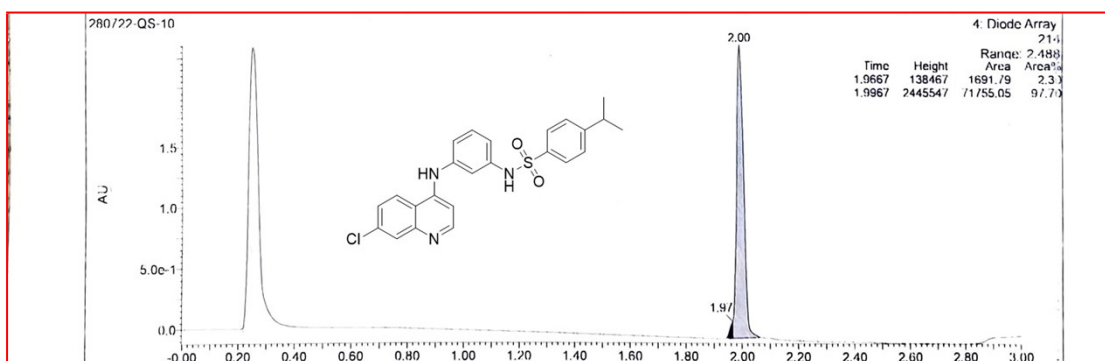

Figure - S58. Purity of compound (QS-11)

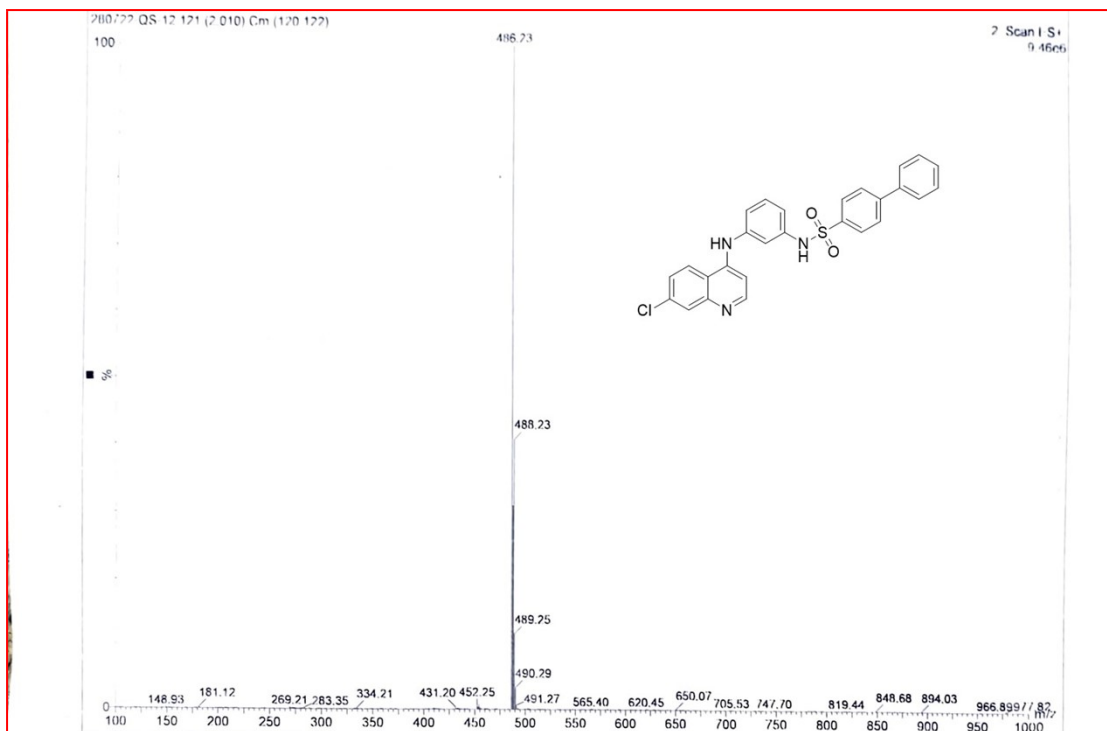

Figure - S59. Mass spectrum of compound (QS-12)

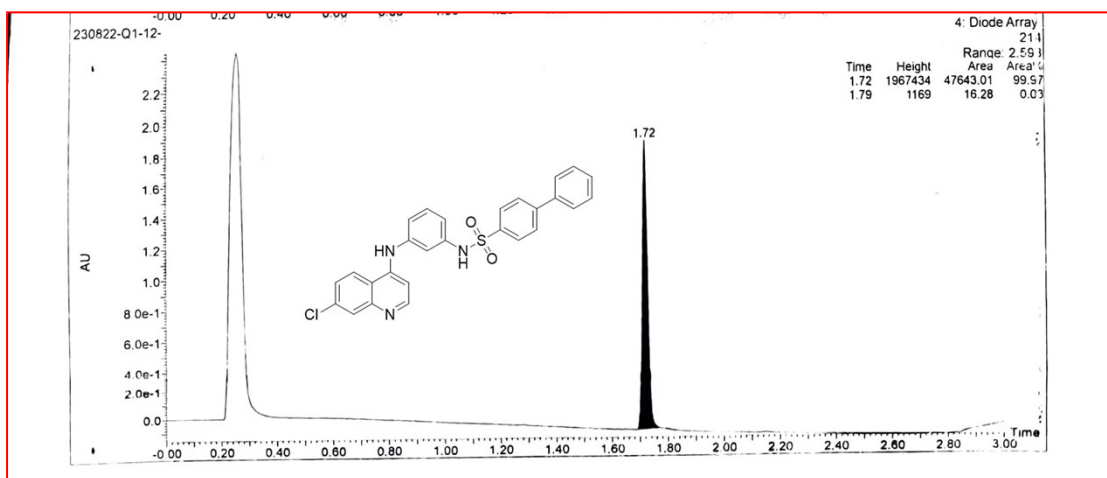

Figure - S60. Purity of compound (QS-12)

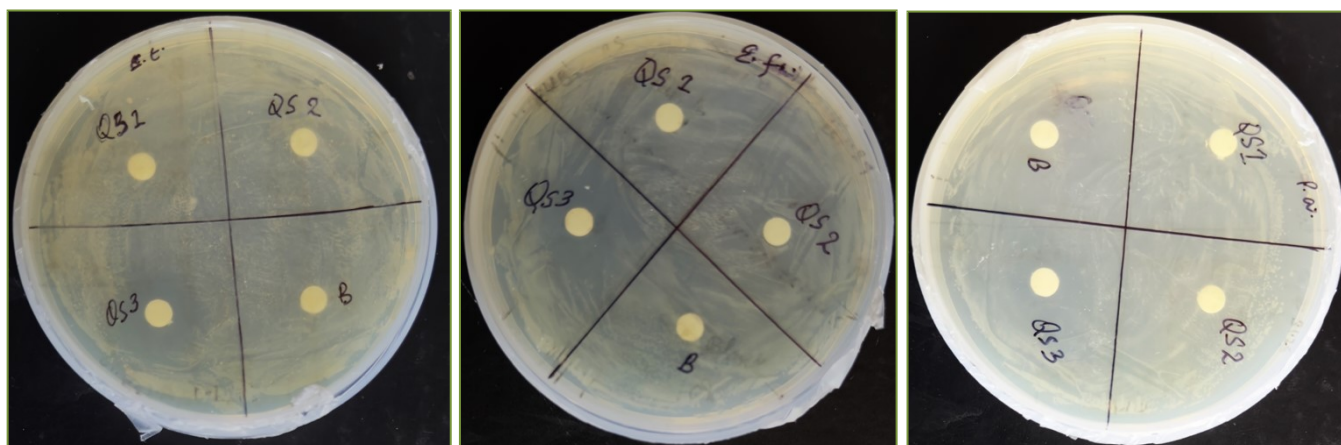

Figure – S61. Clearance zone in the bacterial lawn on treating with compounds

### Combination Assay raw data:

Reading 1:

| Bacterial Strain     | MIC in combination (µg/mL) |       |
|----------------------|----------------------------|-------|
|                      | Comp                       | CIP   |
| <i>E. coli</i>       | 4                          | 0.125 |
| <i>E. faecalis</i>   | 2                          | 0.125 |
| <i>P. aeruginosa</i> | 4                          | 0.5   |
| <i>S. typhi</i>      | 2                          | 0.25  |

Reading 2:

| Bacterial Strain     | MIC in combination (µg/mL) |       |
|----------------------|----------------------------|-------|
|                      | Comp                       | CIP   |
| <i>E. coli</i>       | 2                          | 0.25  |
| <i>E. faecalis</i>   | 2                          | 0.125 |
| <i>P. aeruginosa</i> | 8                          | 0.25  |
| <i>S. typhi</i>      | 2                          | 0.25  |

Reading 3:

| Bacterial Strain | MIC in combination (µg/mL) |     |
|------------------|----------------------------|-----|
|                  | Comp                       | CIP |



|                      |   |       |
|----------------------|---|-------|
| <i>E. coli</i>       | 2 | 0.125 |
| <i>E. faecalis</i>   | 8 | 0.5   |
| <i>P. aeruginosa</i> | 4 | 0.5   |
| <i>S. typhi</i>      | 2 | 0.25  |

### Disk diffusion Assay raw data:

#### Reading 1:

|                      | Zone of Inhibition (in mm) at different concentrations of Test Compound. |     |      |
|----------------------|--------------------------------------------------------------------------|-----|------|
| Isolates             | ½ MIC                                                                    | MIC | 2MIC |
| <i>E. coli</i>       | 6                                                                        | 7   | 7    |
| <i>E. faecalis</i>   | 7                                                                        | 6   | 7    |
| <i>P. aeruginosa</i> | 6                                                                        | 8   | 12   |
| <i>S. typhi</i>      | 7                                                                        | 5   | 8    |

#### Reading 2:

|                      | Zone of Inhibition (in mm) at different concentrations of Test Compound. |     |      |
|----------------------|--------------------------------------------------------------------------|-----|------|
| Isolates             | ½ MIC                                                                    | MIC | 2MIC |
| <i>E. coli</i>       | 6                                                                        | 9   | 8    |
| <i>E. faecalis</i>   | 8                                                                        | 10  | 8    |
| <i>P. aeruginosa</i> | 5                                                                        | 6   | 8    |
| <i>S. typhi</i>      | 7                                                                        | 9   | 5    |

#### Reading 3:

|                      | Zone of Inhibition (in mm) at different concentrations of Test Compound. |     |      |
|----------------------|--------------------------------------------------------------------------|-----|------|
| Isolates             | ½ MIC                                                                    | MIC | 2MIC |
| <i>E. coli</i>       | 6                                                                        | 6   | 7    |
| <i>E. faecalis</i>   | 6                                                                        | 8   | 9    |
| <i>P. aeruginosa</i> | 7                                                                        | 10  | 10   |
| <i>S. typhi</i>      | 7                                                                        | 7   | 11   |

### Environmental strains raw data:

| Isolates Name | Reading 1 | Reading 2 | Reading 3 | Reading 4 |
|---------------|-----------|-----------|-----------|-----------|
| EJH01         | 0         | 0         | 0         | 0         |
| EJH02         | 0         | 0         | 0         | 0         |
| EJH04         | 0         | 0         | 0         | 0         |
| EJH05         | 0         | 0         | 0         | 0         |

|        |   |    |   |   |
|--------|---|----|---|---|
| EJH07  | 0 | 0  | 0 | 0 |
| EJH11  | 0 | 0  | 0 | 0 |
| EJH12  | 0 | 0  | 0 | 0 |
| EJH13  | 0 | 0  | 0 | 0 |
| EJH14  | 0 | 0  | 0 | 0 |
| EJH15  | 0 | 0  | 0 | 0 |
| EJH18  | 0 | 0  | 0 | 0 |
| EJH19  | 0 | 0  | 0 | 0 |
| EJH20  | 0 | 0  | 0 | 0 |
| EJH21  | 0 | 0  | 0 | 0 |
| EJH22  | 0 | 0  | 0 | 0 |
| EJH23  | 0 | 0  | 0 | 0 |
| EJH24  | 0 | 0  | 0 | 0 |
| EJH25  | 0 | 0  | 0 | 0 |
| A200   | 0 | 0  | 0 | 0 |
| AA 201 | 0 | 0  | 0 | 0 |
| AA 202 | 8 | 9  | 6 | 9 |
| AA 209 | 0 | 0  | 0 | 0 |
| AA 216 | 0 | 0  | 0 | 0 |
| AA 221 | 0 | 0  | 0 | 0 |
| AA 224 | 0 | 0  | 0 | 0 |
| AA 237 | 0 | 0  | 0 | 0 |
| AA 240 | 0 | 0  | 0 | 0 |
| AA 243 | 0 | 0  | 0 | 0 |
| AA 245 | 0 | 0  | 0 | 0 |
| AA 248 | 0 | 0  | 0 | 0 |
| AA 261 | 0 | 0  | 0 | 0 |
| AA 269 | 0 | 0  | 0 | 0 |
| AA 273 | 0 | 0  | 0 | 0 |
| AA 276 | 0 | 0  | 0 | 0 |
| AA 290 | 8 | 10 | 7 | 7 |

**Hemolysis raw data:**

| Control | 0.05 | 0.1  | 0.25 | 0.5 | 1    |
|---------|------|------|------|-----|------|
| 0.6     | 1.23 | 2.62 | 2.8  | 2.9 | 3.24 |
| 0.88    | 1.43 | 1.9  | 2.5  | 3.1 | 3.9  |
| 0.9     | 1.33 | 2.26 | 2.6  | 3.2 | 4.2  |

**MIC raw data:**

| QS-3      | <i>E. coli</i> | <i>E. faecalis</i> | <i>P. aeruginosa</i> | <i>K. pneumoniae</i> | <i>S. typhi</i> |
|-----------|----------------|--------------------|----------------------|----------------------|-----------------|
| Reading 1 | 128            | 128                | 64                   | 256                  | 512             |
| Reading 2 | 128            | 64                 | 64                   | 128                  | 512             |
| Reading 3 | 128            | 128                | 32                   | 256                  | 512             |
